# In-cell structures of a conserved supramolecular array at the mitochondria-cytoskeleton interface in mammalian sperm

Miguel Ricardo Leung<sup>1,2</sup>, Riccardo Zenezini Chiozzi<sup>3,4</sup>, Marc C. Roelofs<sup>1</sup>, Johannes F. Hevler<sup>3,4</sup>, Ravi Teja Ravi<sup>1</sup>, Paula Maitan<sup>5,6</sup>, Min Zhang<sup>7</sup>, Heiko Henning<sup>5</sup>, Elizabeth G. Bromfield<sup>7,8</sup>, Stuart C. Howes<sup>1</sup>, Bart M. Gadella<sup>7</sup>, Albert J.R. Heck<sup>3,4</sup>, and Tzviya Zeev-Ben-Mordehai<sup>1,2,\*</sup>

<sup>1</sup>Cryo-Electron Microscopy, Bijvoet Centre for Biomolecular Research, Utrecht University, 3584 CH Utrecht, The Netherlands

<sup>2</sup>The Division of Structural Biology, Wellcome Centre for Human Genetics, The University of Oxford, Oxford OX3 7BN, United Kingdom

<sup>3</sup>Biomolecular Mass Spectrometry & Proteomics, Bijvoet Centre for Biomolecular Research and Utrecht Institute for Pharmaceutical Sciences, Utrecht University, 3584 CH Utrecht, The Netherlands

<sup>4</sup>Netherlands Proteomics Centre, 3584 CH Utrecht, The Netherlands

<sup>5</sup>Department of Clinical Sciences, Faculty of Veterinary Medicine, Utrecht University 3584 CM Utrecht, The Netherlands

<sup>6</sup>Veterinary Department, Universidade Federal de Viçosa, 36570-900 Viçosa, Minas Gerais, Brazil

<sup>7</sup>Department of Farm & Animal Health and Biomolecular Health Sciences, Faculty of Veterinary Medicine, Utrecht University, 3584 CM Utrecht, The Netherlands

<sup>8</sup>Priority Research Centre for Reproductive Science, Faculty of Science, The University of Newcastle, Callaghan, Australia, 2308

\*correspondence to: z.zeev@uu.nl

## Summary

**Mitochondria-cytoskeleton interactions modulate cellular physiology by regulating mitochondrial transport, positioning, and immobilization. However, there is very little structural information defining mitochondria-cytoskeleton interfaces in any cell type. Here, we use cryo-focused ion beam milling-enabled cryo-electron tomography to image mammalian sperm, where mitochondria wrap around the ciliary cytoskeleton. We find that mitochondria are tethered to their neighbors through inter-mitochondrial linkers and are anchored to the cytoskeleton through ordered arrays on the outer mitochondrial membrane. We use subtomogram averaging to resolve in-cell structures of these arrays from three mammalian species, revealing they are conserved across species despite variations in mitochondrial dimensions and cristae organization. We find that the arrays consist of boat-shaped particles anchored on a network of membrane pores whose arrangement and dimensions are consistent with voltage dependent anion channels. Proteomics and in-cell cross-linking mass spectrometry suggest that the conserved arrays are composed of glycerol kinase-like proteins. Ordered supramolecular assemblies may serve to stabilize similar contact sites in other cell types where mitochondria need to be immobilized in specific subcellular environments, such as in muscles and neurons.**

sperm | mitochondria-cytoskeleton contact | cryo-electron tomography | cryo-FIB milling | cross-linking mass spectrometry | subtomogram averaging

## Introduction

In many cell types, mitochondria collectively form a dynamic network whose members divide, fuse, and communicate with one another (Glancy et al., 2015; Viana et al., 2020; Vincent et al., 2017). Through interactions with the cytoskeleton, mitochondria are transported – sometimes across large distances – and positioned in response to dynamic stimuli (Fenton et al., 2021; Moore and Holzbaaur, 2018). Interactions with the cytoskeleton can also restrain mitochondria to specific subcellular locations. In neurons, axonal mitochondria can be immobilized by interactions with the microtubule or actin cytoskeletons (Chen and Sheng, 2013; Gutnick et al., 2019; Kang et al., 2008). In cardiac and skeletal muscle, mitochondrial distribution is regulated by inter-

actions with myofibrils and intermediate filaments (Milner et al., 2000; Stone et al., 2007). However, despite the prevalence of inter-mitochondria and mitochondria-cytoskeleton interactions and their integral roles in cellular function, there is very little information on the molecular architectures of these interaction sites in any cell type.

One of the most striking mitochondrial configurations occurs in amniote sperm, where mitochondria are arranged in a spiral around the axoneme, defining a region called the midpiece (Fawcett, 1970, 1975). Mitochondria are among the few organelles retained in sperm throughout their maturation, during which they otherwise lose most of their cytoplasm and organelles *en route* to becoming highly streamlined cells specialized for finding and fusing with the egg. The extensive mitochondrial sheath in amniote sperm may be an adaptation needed to power the large, long flagellum in these lineages. Variations in midpiece morphometry affect sperm motility and competitiveness (Firman and Simmons, 2010; Fisher et al., 2016), and different species rely on energy from mitochondrial respiration to different extents (Marin et al., 2003; Tourmente et al., 2015), warranting comparative studies of mitochondrial structure across species.

The core of the midpiece is the ciliary cytoskeleton, composed of the microtubule-based axoneme and accessory elements called outer dense fibers (ODFs). A poorly-characterized network of cytoskeletal filaments called the submitochondrial reticulum lies between the ODFs and the mitochondria. The submitochondrial reticulum co-purifies with the outer mitochondrial membrane (OMM), suggesting that they are intimately associated (Olson and Winfrey, 1986, 1990). Mitochondria wrap around the cytoskeleton and are in turn ensheathed by the plasma membrane. As a consequence of this arrangement, each mitochondrion has three distinct surfaces (Olson and Winfrey, 1992) – one facing the axoneme, one facing the plasma membrane, and one facing neighboring mitochondria. Thin-section electron microscopy (EM) (Olson and Winfrey, 1992) and freeze-fracture EM (Friend and Heuser, 1981) suggest that each surface is characterized by a unique membrane protein profile. Notwithstanding the insight gained from these methods, such techniques require harsh sample preparation steps that can dis-

tort fine cellular structure and limit achievable resolution (Al-Amoudi et al., 2004). As such, the molecular landscape of inter-mitochondrial and mitochondrial-cytoskeleton contacts in the sperm midpiece remains largely unexplored.

Assembly of the mitochondrial sheath occurs late in spermiogenesis and involves an intricately choreographed series of events (Ho and Wey, 2007; Otani et al., 1988). Initially, spherical mitochondria are broadly distributed in the cytoplasm. Mitochondria are then recruited to the flagellum, where they form ordered rows along the flagellar axis. Finally, mitochondria elongate and twist around the axoneme. While our understanding of the molecular details of these processes is cursory at best, studies on gene-disrupted mice have implicated a number of proteins in mitochondrial sheath morphogenesis. For instance, mice expressing mutant forms of kinesin light chain 3 (KLC3) have malformed midpieces, hinting at a role for microtubule-based transport (Zhang et al., 2012). Another example are the voltage dependent anion channels (VDACs), which are highly abundant proteins that mediate transport of metabolites, ions, and nucleotides like ATP across the OMM (Colombini, 2012). Male mice lacking VDAC3 are infertile and their sperm cells have disorganized mitochondrial sheaths (Sampson et al., 2001), so VDACs may also have unappreciated roles in mitochondrial trafficking; indeed, KLC3 binds mitochondria through VDAC2 (Zhang et al., 2012). Similarly, disrupting sperm-specific isoforms of glycerol kinase leads to gaps in the mitochondrial sheath despite proper initial alignment of spherical mitochondria (Chen et al., 2017b; Shimada et al., 2019). Mice lacking spermatogenesis-associated protein 19 (SPATA19) (Mi et al., 2015) or glutathione peroxidase 4 (GPX4) (Imai et al., 2009; Schneider et al., 2009) also have structurally abnormal mitochondria.

Here, we use cryo-focused ion beam (cryo-FIB) milling-enabled cryo-electron tomography (cryo-ET) to image the mitochondrial sheath in mature sperm from three mammalian species. We take advantage of the uniquely multi-scale capabilities of cryo-ET to unveil new aspects both of the overall organization of the mitochondrial sheath and of the molecular structures important for its assembly. We find that mitochondria are tethered to their neighbors through inter-mitochondrial linkers and to the underlying cytoskeleton through conserved protein arrays on the OMM. Subtomogram averaging revealed that these arrays are anchored on a lattice of OMM pores whose arrangement and dimensions are consistent with VDACs. Proteomics and in-cell cross-linking mass spectrometry suggest that the arrays consist of glycerol kinase (GK)-like proteins. Our data thus show that although mitochondrial dimensions and cristae architecture vary across species, the architecture of the mitochondria-cytoskeleton interface is conserved at the molecular level.

## Results

**Mitochondrial dimensions and cristae organization vary across species.** We imaged the mitochondrial sheath in mature sperm from three mammalian species, namely the pig (*Sus scrofa*), the horse (*Equus caballus*), and the mouse

(*Mus musculus*) (Fig. 1). These species differ in terms of sperm size, motility patterns, and metabolism. To visualize the overall organization of the mitochondrial sheath, we imaged whole sperm with a Volta phase plate (VPP) (Danev et al., 2014; Fukuda et al., 2015). Neural-network based segmentation (Chen et al., 2017a) of the mitochondrial membrane allowed us to visualize mitochondrial organization in three dimensions (Fig. 1a-f).

To investigate variations in mitochondrial width along the midpiece, we first measured the width of each mitochondrion at multiple points along its length. We then divided mitochondria into groups based on their positions along the midpiece, as measured by their distance from the head (Fig. S1). The midpiece is ~10  $\mu\text{m}$  long in both pig and horse sperm, but ~20  $\mu\text{m}$  long in mouse sperm, so each group represents ~2  $\mu\text{m}$  in the pig and the horse and ~4  $\mu\text{m}$  in the mouse. We found that mouse sperm mitochondria are ~1.5 times wider than pig and horse sperm mitochondria overall (Fig. S1a). In all three species studied, most mitochondria in the middle (~60%) of the midpiece are crescent-shaped tubes (Fig. 1d-f) with consistent widths along their lengths (Fig. S1b). Mitochondria at the proximal end of the midpiece are larger than their more distal counterparts (Fig. 1a-c, S1a). Moreover, proximal mitochondria have more variable shapes, evidenced by greater variation in their widths at different point along their lengths (Fig. S1b). Because mitochondria wrap around the axoneme, variations in mitochondrial dimensions both across species and along the proximodistal axis of the flagellum affect the overall diameter and rigidity of the midpiece, likely fine-tuning the hydrodynamics of sperm motility.

To visualize the internal organization of sperm mitochondria in a near-native state, we imaged sperm thinned by cryo-FIB milling (Fig. 1g-l). This revealed unexpected diversity in the internal ultrastructure of mitochondria across mammalian species, especially in terms of cristae morphology. Horse sperm mitochondria have an expanded intermembrane space and a condensed matrix (Fig. 1i-j). Mouse sperm mitochondria have an expanded matrix, with a narrow intermembrane space and thin cristae (Fig. 1k-l). Pig sperm mitochondrial morphology is intermediate (Fig. 1g-h), and although the mitochondrial matrix was dense, we could identify individual complexes that resembled ATP synthase on cristae of FIB-milled mitochondria (Fig. S2a-b), which was confirmed by subtomogram averaging (Fig. S2b').

Inter-species differences in cristae morphology correlate with measurements of matrix volume relative to mitochondrial volume (Fig. S2d). In this regard, horse sperm mitochondria resemble “condensed” mitochondria, which correlate with higher rates of oxidative activity in a number of different cell types, including developing germ cells, neurons, and liver (Hackenbrock, 1968; De Martino et al., 1979; Perkins and Ellisman, 2011). Indeed, horse sperm are dependent on oxidative phosphorylation (Davila et al., 2016), whereas pig (Marin et al., 2003) and mouse sperm (Mukai and Okuno, 2004; Odet et al., 2013) are thought to rely largely on a glycolytic mechanisms.

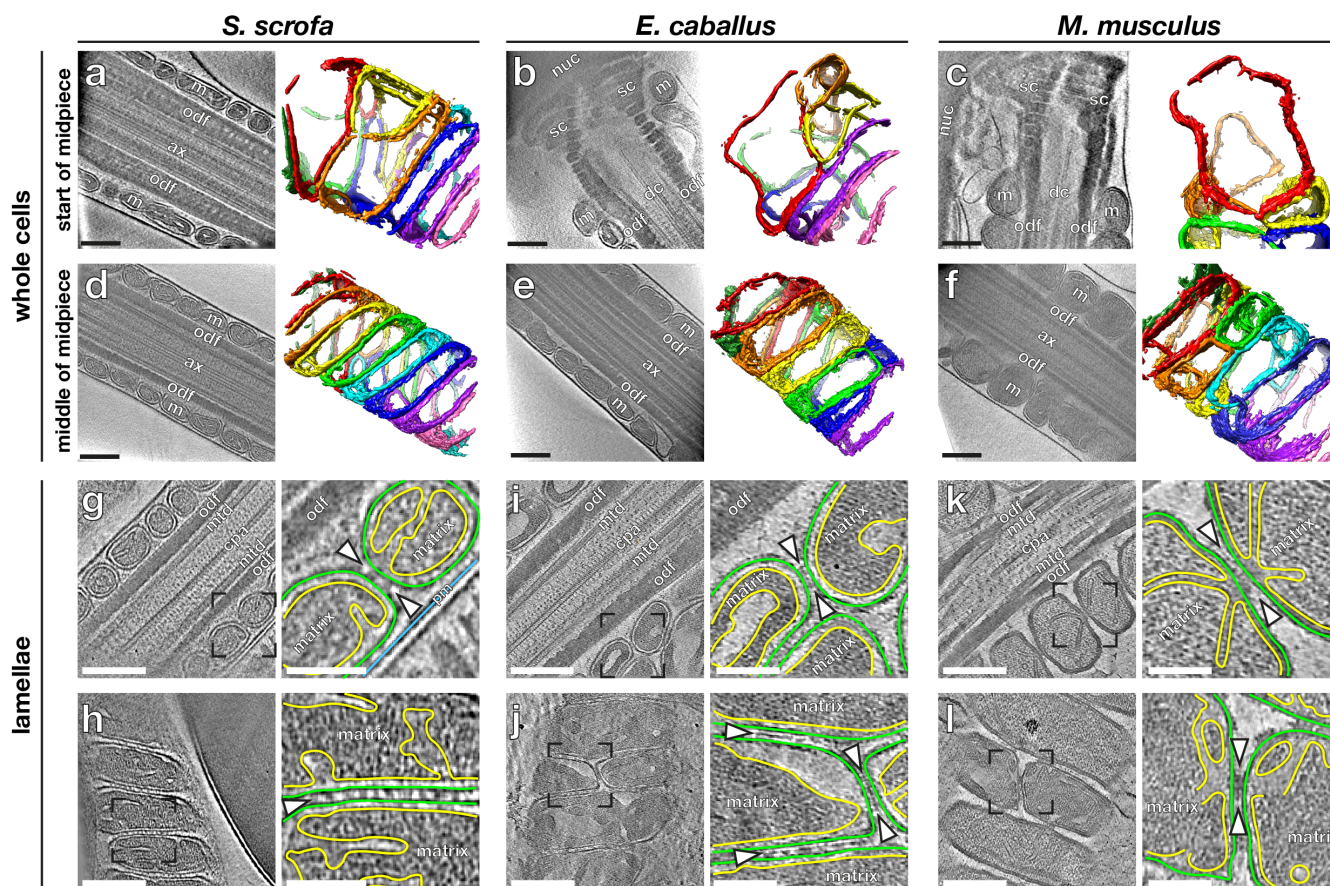

**Fig. 1. Mitochondrial dimensions and cristae organization vary across species.** (a-f) Slices through Volta phase plate cryo-tomograms (left) and corresponding three-dimensional segmentations (right) of mitochondria from the start (a-c) or middle (d-f) of the midpiece from pig (a,d), horse (b,e), and mouse (c,f) sperm. (g-l) Slices through cryo-tomograms of FIB-milled pig (g,h), horse (i,j), and mouse (k,l) sperm midpieces. Right panels show digital zooms of the regions boxed out in the left panels. The outer mitochondrial membrane is traced in green, the inner mitochondrial membrane in yellow, and the plasma membrane in blue. Arrowheads indicate inter-mitochondrial linker complexes. **Labels:** nuc – nucleus, sc – segmented columns, m – mitochondria, odf – outer dense fibers, dc – distal centriole, ax – axoneme, mtd – microtubule doublets, cpa – central pair apparatus, pm – plasma membrane. **Scale bars:** (a-l) left panels – 250 nm, (g-l) right panels – 100 nm.

196 **Inter-mitochondrial junctions are associated with** 216  
 197 **linker complexes.** Mitochondria are closely packed within 217  
 198 the mitochondrial sheath, but it is unclear whether or how 218  
 199 individual organelles communicate with their neighbors. To 219  
 200 address this, we imaged inter-mitochondrial junctions captured 220  
 201 in FIB-milled sperm lamellae. We observed trans- 221  
 202 mitochondrial cristae alignment in mouse sperm (Fig. 1k- 222  
 203 l), but not in pig or in horse sperm (Fig. 1g-j). Trans- 223  
 204 mitochondrial cristae alignment has also been observed in 224  
 205 muscle tissue of various organisms, and is proposed to medi- 225  
 206 ate electrochemical coupling between adjacent mitochondria 226  
 207 (Picard et al., 2015). To our knowledge, this is the first time 227  
 208 this phenomenon has been observed in mature sperm from 228  
 209 any lineage. It is particularly curious, however, that trans- 229  
 210 mitochondrial cristae alignment in sperm is species-specific.

211 We found that inter-mitochondrial junctions are charac- 230  
 212 terized by novel inter-mitochondrial linker complexes in all 231  
 213 three species (arrowheads in Fig. 1g-l, Fig. S2c). These 232  
 214 inter-mitochondrial linkers span the 8-nm distance between 233  
 215 the outer membranes of neighboring mitochondria. In mouse 234

sperm, these linkers are specifically associated with sites of 216  
 trans-mitochondrial cristae alignment (Fig. 1k-l); in the pig 217  
 and in the horse, they are positioned at regularly spaced 218  
 intervals along inter-mitochondrial junctions (Fig. 1h-j). 219  
 Electron-dense inter-mitochondrial junctions were also seen 220  
 in cardiomyocytes by classical EM (Duvert et al., 1985; 221  
 Huang et al., 2013; Picard et al., 2015). Thus, it is plausible 222  
 that the as-yet-unidentified linker complexes we visualize 223  
 here represent a more general structural mechanism for 224  
 orchestrating inter-mitochondrial communication in various 225  
 cell types. 226

#### **Ordered protein arrays at the mitochondria-cytoskeleton**

**interface are conserved across species.** To determine how mitochondria 227  
 interact with the flagellar cytoskeleton, we imaged the mitochondria-cytoskeleton 228  
 interface in cryo-FIB milled lamellae (Fig. 2). We found that the 229  
 axoneme-facing surface of the OMM is characterized by an ordered protein array that is 230  
 absent from the plasma membrane-facing surface (Fig. 2a). These arrays are present 231  
 232  
 233  
 234

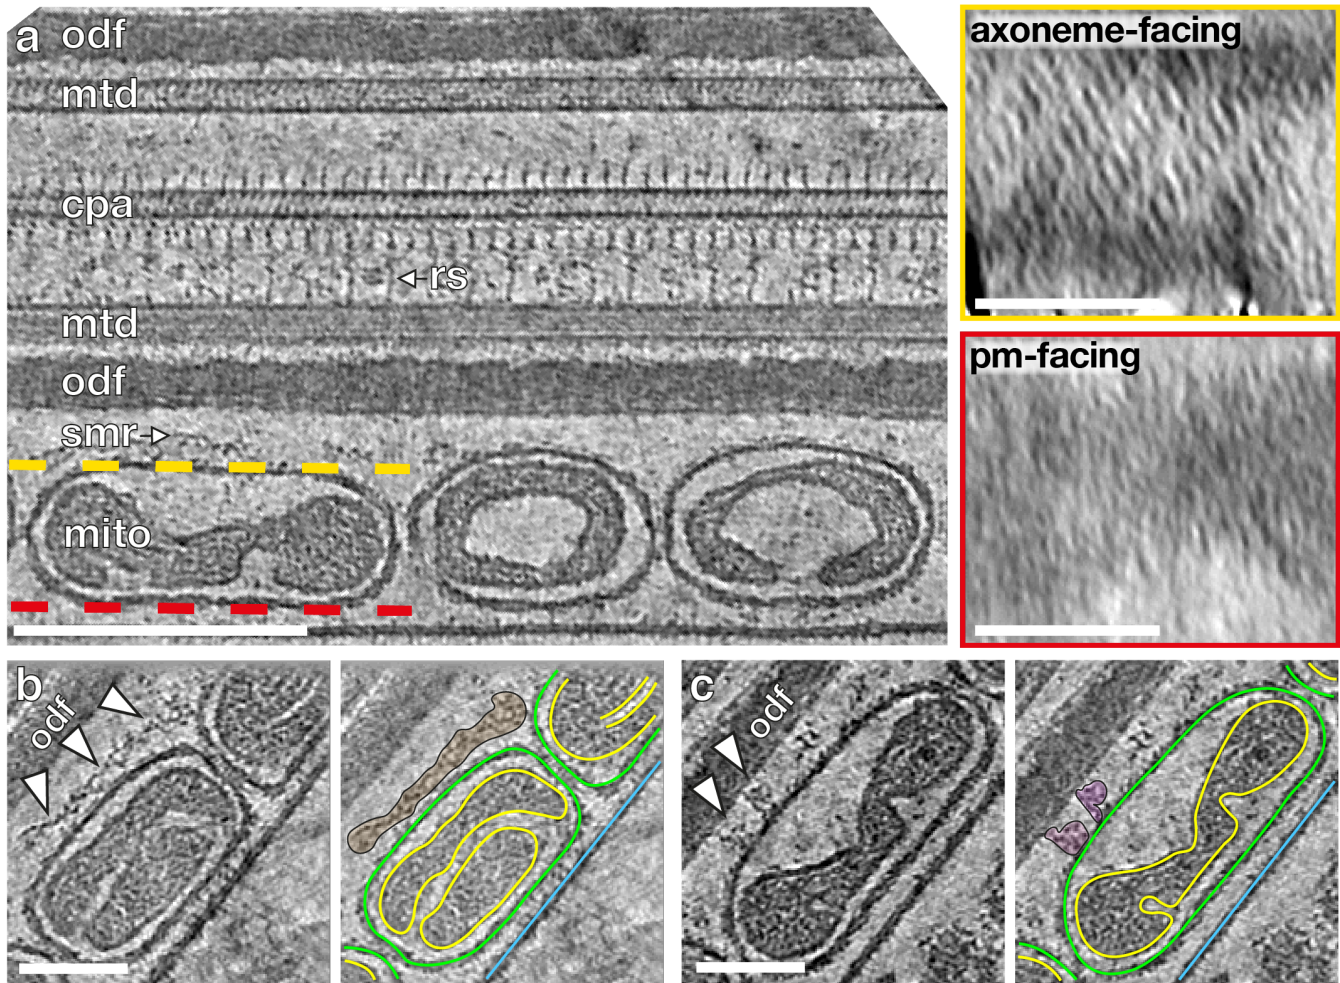

**Fig. 2. Ordered protein arrays on the outer mitochondrial membrane directly interact with the submitochondrial reticulum.** (a) Slice through a cryo-tomogram of a FIB-milled horse sperm midpiece, showing mitochondria (mito), the submitochondrial reticulum (smr) outer dense fibers (odf), microtubule doublets (mtd), and the central pair apparatus (cpa). Note how individual complexes (like the radial spoke, rs) are visible in the raw tomogram. The ordered protein array is only found on the axoneme-facing surface (yellow) of midpiece mitochondria, and not on the plasma membrane-facing surface (red). (b,c) Slices through a cryo-tomogram of a FIB-milled horse sperm midpiece showing how the array directly interacts with the submitochondrial reticulum to anchor mitochondria to the ciliary cytoskeleton (arrowheads). In right panels, the outer mitochondrial membrane is traced in green, the inner mitochondrial membrane in yellow, and the plasma membrane in blue. **Scale bars:** (a) left – 250 nm, insets – 100 nm; (b,c) 100 nm.

235 in all three species and along the entire midpiece (Fig. S3a-f) 252  
 236 and resemble the particle rows seen on the axoneme-facing 253  
 237 surface of the OMM in guinea pig sperm (Friend and Heuser, 254  
 238 1981) and in mouse sperm (Woolley et al., 2005) by freeze- 255  
 239 fracture EM. We observed direct interactions between the ar- 256  
 240 rays and cytoskeletal filaments surrounding the ODFs (Fig. 257  
 241 2b-c), indicating that these arrays tether mitochondria to the 258  
 242 midpiece cytoskeleton. 259

243 We then aligned and averaged sub-volumes containing 260  
 244 the protein arrays and the underlying OMM (Fig. 3, Ta- 261  
 245 ble S1). Our averages revealed ~22-nm-long two-fold- 262  
 246 symmetric boat-shaped structures connected via four densi- 263  
 247 ties to a porous membrane (Fig. 3, Fig. S3g-i). Each boat- 264  
 248 shaped particle rises ~5 nm above the membrane and consists 265  
 249 of two tilde-shaped densities arranged end-to-end. The boat- 266  
 250 shaped structures form rows in which each particle is related 267  
 251 to its closest neighbors by a ~10 nm translation perpendicu- 268

lar to the particle long axis and a ~6 nm shift along this axis, yielding a center-to-center spacing of ~12 nm (Fig. 3d-f). Each row is oriented ~120° to the long axis of the flagellum and adjacent rows are spaced ~12 nm apart, forming extensive arrays on the axoneme-facing surface of the OMM (Fig. 3g). Remarkably, the averages we obtained from the three species were highly similar, both in terms of individual particle dimensions and in terms of their supramolecular arrangement (Fig. 3, Fig. S3). This conservation suggests that these arrays are a crucial structural element of the mitochondrial sheath.

Our averages revealed that the OMM underlying the protein arrays is studded with ~3-4 nm pores arranged in a pseudo-lattice with a center-to-center spacing of ~5 nm. (Fig. 3a-c, Fig. S3g-i). These pore sizes are consistent with the diameters of the voltage dependent anion channels (VDACs), which are known to form ordered arrays in the

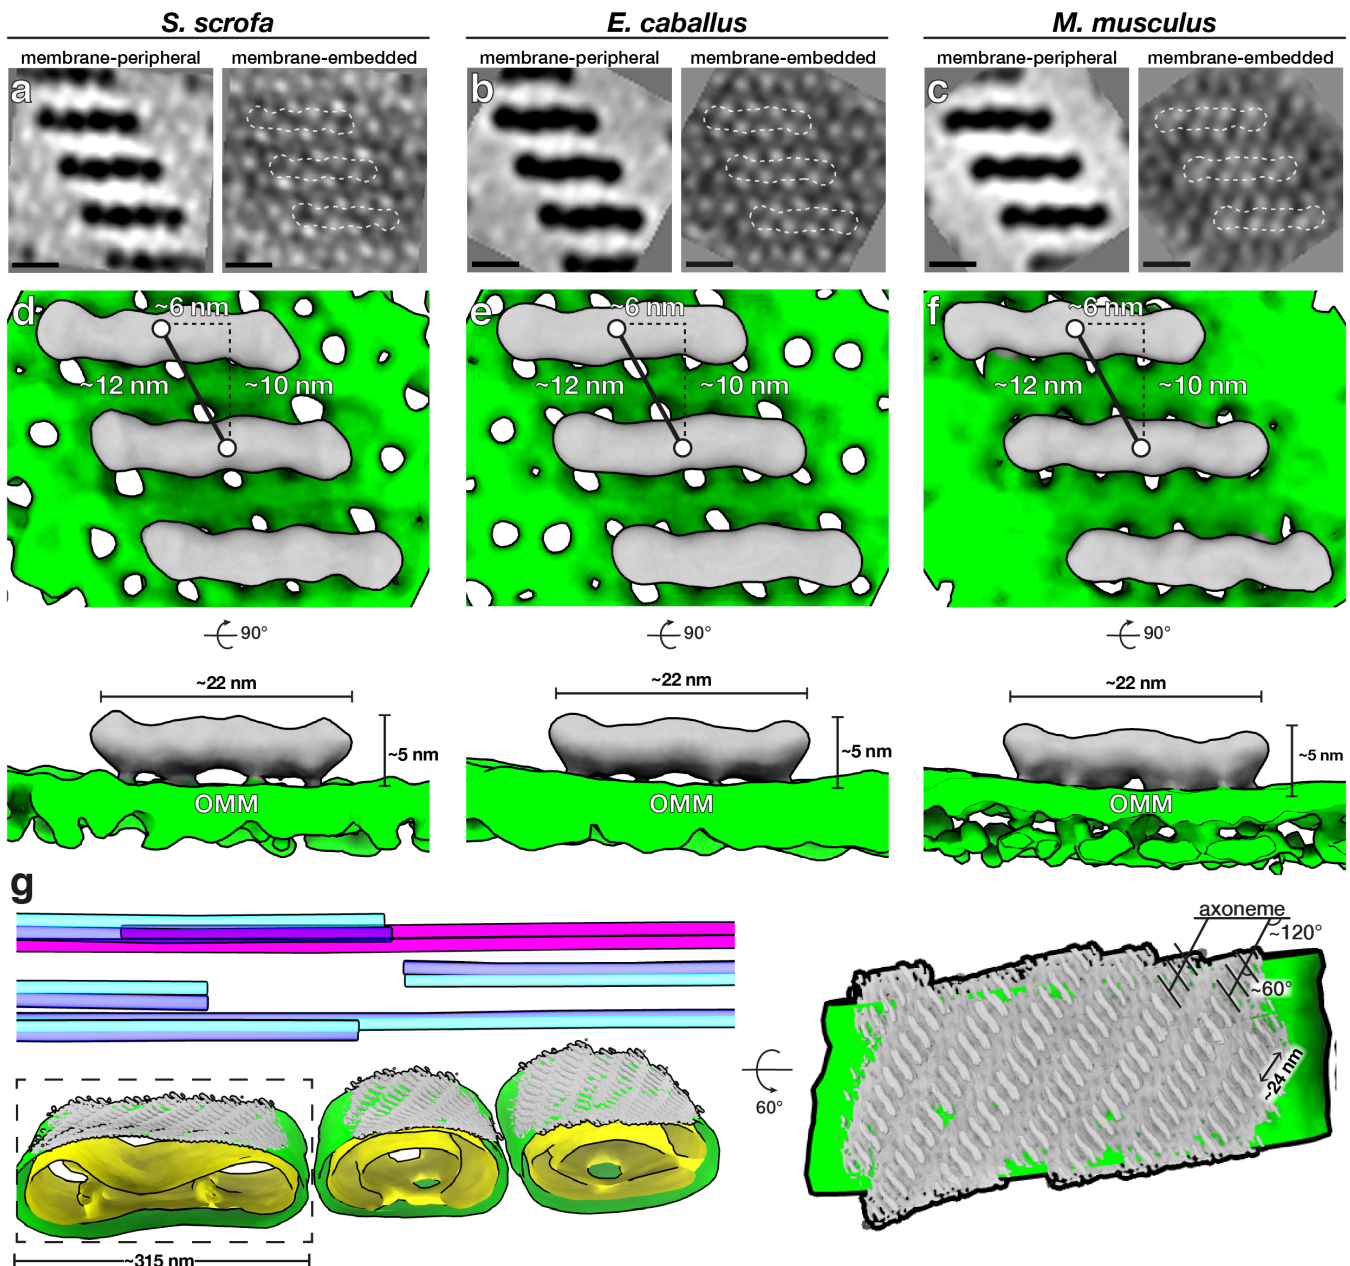

**Fig. 3. Ordered protein arrays at the mitochondria-cytoskeleton interface are conserved across species.** (a-c) Subtomogram averages of the protein arrays and underlying outer mitochondrial membrane (OMM) after applying twofold symmetry (note that density is black). (d-f) Isosurface renderings of the subtomogram averages in (a-c) with boat-shaped particles in grey and the OMM in green. (g) Left panel: Segmentation of the tomogram shown in Figure 2a, with the OMM in green, the IMM in yellow, microtubule doublets in blue, and the cpa in pink. Subtomogram averages of boat-shaped particles are colored grey and plotted back into their positions and orientations in the tomogram. Right panel: Rotated and zoomed-in view of the axoneme-facing surface of a mitochondrion. The axoneme is oriented horizontally, so the ladder-like arrays are oriented  $\sim 120^\circ$  to the flagellar long axis, and individual particles within the array are oriented  $\sim 60^\circ$  to this axis. **Scale bars:** (a-c) 10 nm.

269 OMM (Gonçalves et al., 2007; Guo and Mannella, 1993; 277  
 270 Hoogenboom et al., 2007; Mannella, 1982). Indeed, our 278  
 271 label-free quantitative proteomics experiments show that the 279  
 272 most abundant OMM proteins in pig sperm are VDAC2 and 280  
 273 VDAC3 (Table S2). Furthermore, the lattice dimensions in 281  
 274 our averages closely match those of VDAC in purified Neu- 282  
 275 rospora OMM (Guo and Mannella, 1993; Mannella, 1998). 283  
 276 The lattice can be modeled by fitting multiple copies of the  
 VDAC2 crystal structure (Schredelseker et al., 2014) (Fig. S4a). We oriented VDAC2 in the membrane plane based on its known topology (Bayrhuber et al., 2008; Tomasello et al., 2013); however, at the current resolution, we cannot determine the orientation around the pore axis. Thus, in our model, each boat-shaped particle stretches across 8 VDAC molecules (Fig. 3).

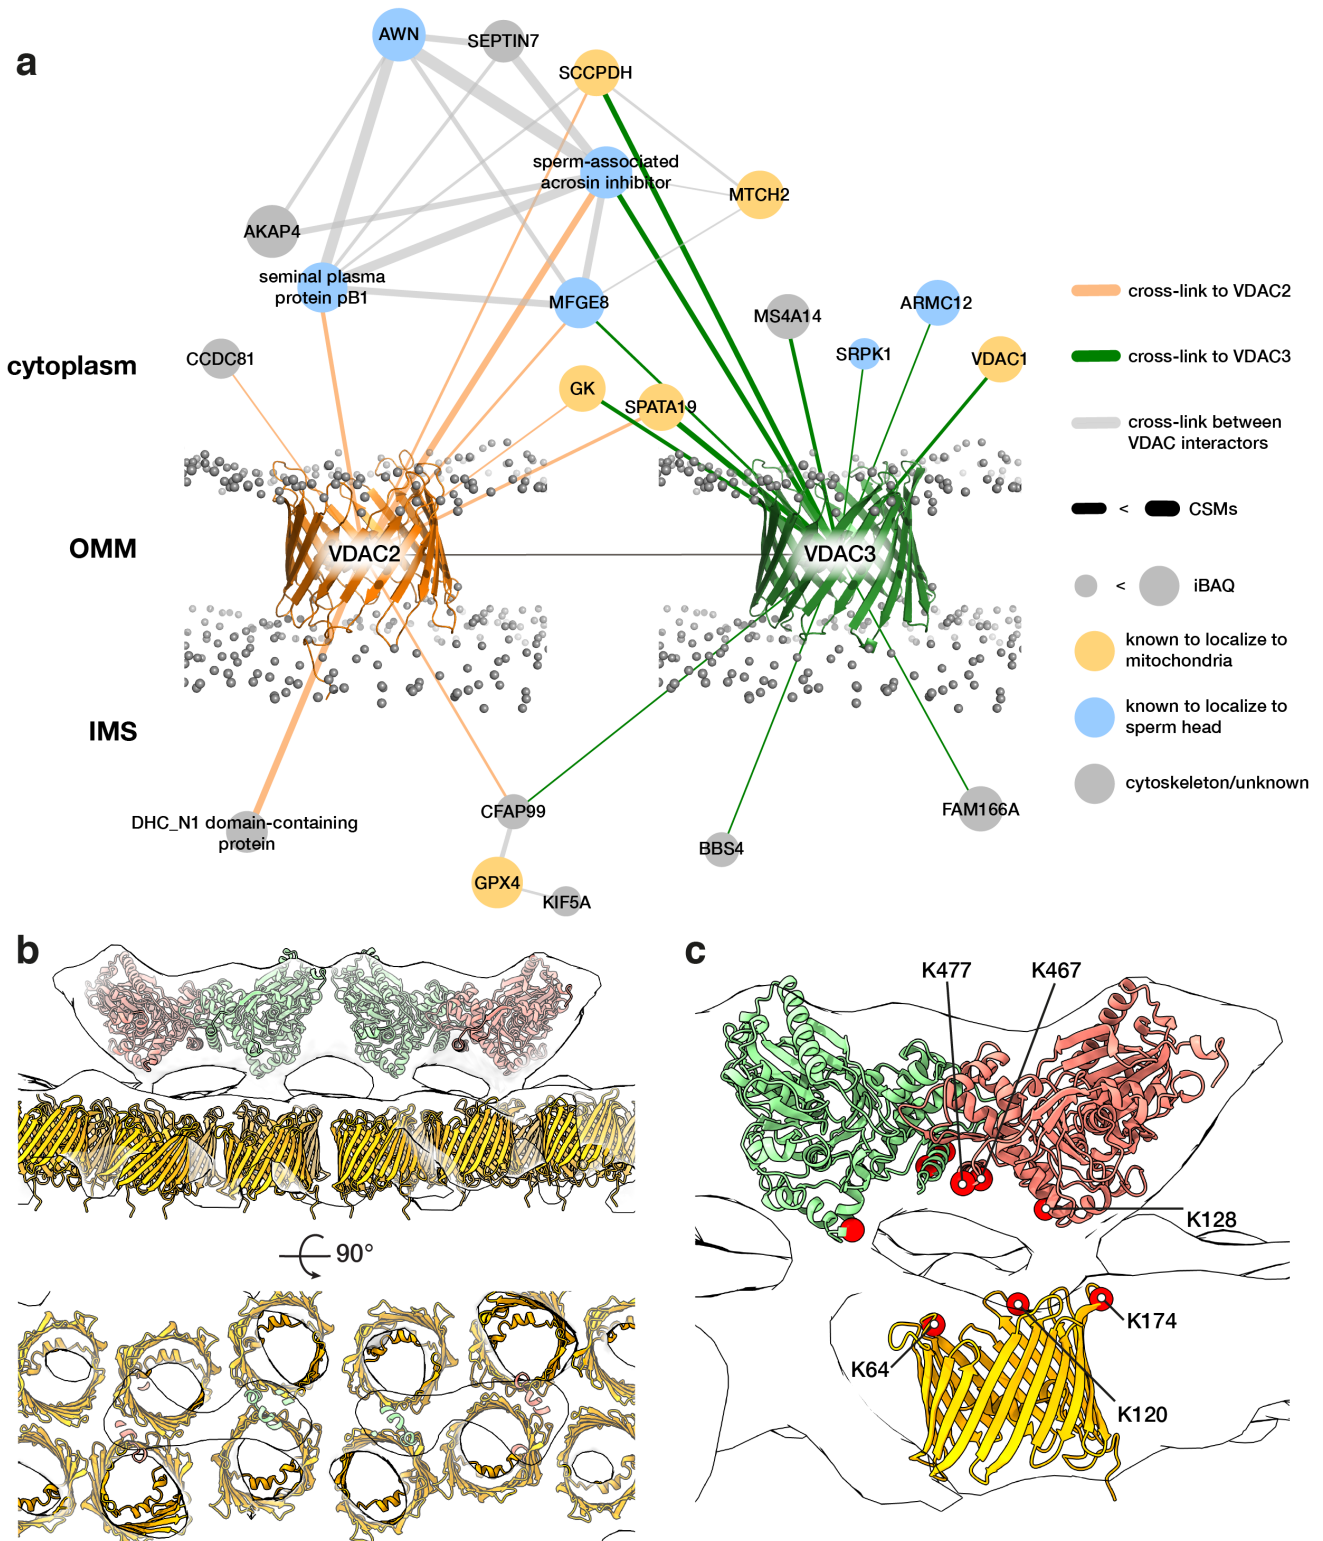

**Fig. 4. Modelling the outer mitochondrial membrane (OMM) array as glycerol kinase-like (GK) proteins anchored on voltage dependent anion channels (VDACs).** (a) The VDAC2/VDAC3 interactome derived from in-cell XL-MS of pig sperm. Protein nodes are colored according to their known subcellular localizations (yellow – mitochondria, blue – head, grey – cytoskeleton/unknown). Gray spheres indicate the phosphate groups of a simulated lipid bilayer which was structurally aligned based on the simulation for monomeric mouse VDAC1 (PDB 4C69) obtained from the MemProtMD server (Newport et al., 2019). (b) Modeling the OMM array as GK-like proteins anchored on VDACS. A GK-like dimer-of-dimers homology model (red and green) and VDAC homology models (yellow) were fitted into the pig subtomogram average map (white). (c) The positions of cross-linked Lys residues (red circles) are consistent with GK and VDAC orientation assignments in our model.

284 **Glycerol kinase-like proteins are probable con-** 341  
285 **stituents of the conserved arrays at the mitochondria-** 342  
286 **cytoskeleton interface.** To search for possible constituents 343  
287 of the protein arrays on the VDAC lattice, we used in-cell 344  
288 cross-linking mass spectrometry (XL-MS) (Fasci et al., 2018; 345  
289 Liu et al., 2018) to find potential VDAC2/VDAC3 interac- 346  
290 tion partners on the OMM (**Fig. 4**). We treated pig sperm 347  
291 cells with the cross-linker disuccinimidyl sulfoxide (DSSO), 348  
292 which covalently links free lysines that are within ~3 nm 349  
293 (C $\alpha$ -C $\alpha$ ) of each other. To increase confidence, we screened 350  
294 for cross-links identified with at least two cross-link spectral 351  
295 matches (CSMs) (see Materials and Methods for details).

296 We first screened candidate proteins based on their known 352  
297 subcellular localizations (**Fig. 4a**). VDAC2/VDAC3 cross- 353  
298 linked to mitochondria-associated proteins as well as to 354  
299 sperm head-associated proteins. This is consistent with im- 355  
300 munofluorescence studies localizing VDAC2/VDAC3 both to 356  
301 the midpiece and to the acrosome, a large vesicle capping 357  
302 the anterior sperm nucleus (Hinsch et al., 2004; Kwon et al., 358  
303 2013). Of the proteins in the mitochondria-associated inter- 359  
304 action hub, three proteins are particularly noteworthy because 360  
305 they are known to localize to the OMM and because their 361  
306 disruption results in dysplasia of the mitochondrial sheath: 362  
307 spermatogenesis-associated protein 19 (SPATA19) (Mi et al., 363  
308 2015), glutathione peroxidase 4 (GPX4) (Imai et al., 2009; 364  
309 Schneider et al., 2009), and glycerol kinase (GK) (Chen et 365  
310 al., 2017b; Shimada et al., 2019).

311 To distinguish among these candidates, we compared the 367  
312 location of the cross-links with the known topology of VDAC 368  
313 in the OMM (Bayrhuber et al., 2008; Tomasello et al., 2013). 369  
314 GPX4 would interact on the side facing the intermembrane 370  
315 space, whereas SPATA19 and GK would interact on the cy- 371  
316 toplasmic face. Both SPATA19 and GK are highly abundant 372  
317 (**Table S2**), as would be expected for proteins forming exten- 373  
318 sive arrays. Assuming an average protein density of ~1.43 374  
319 g/cm<sup>3</sup> (Quillin and Matthews, 2000), which corresponds to 375  
320 ~0.861 Da/Å<sup>3</sup>, we estimate that each boat-shaped particle in 376  
321 the array has a molecular weight of ~250 kDa. SPATA19 is 377  
322 a small protein with an estimated molecular weight of ~18 378  
323 kDa. To fit into our EM densities, it must either be present 379  
324 in multiple copies or form a complex with other proteins. In 380  
325 contrast, GK has an estimated molecular weight of ~60 kDa 381  
326 and is known to form S-shaped dimers (~120 kDa) that are 382  
327 conserved from bacteria (Bystrom et al., 1999; Fukuda et 383  
328 al., 2016) to eukaryotes (Balogun et al., 2019; Schnick et al., 384  
329 2009).

330 To build a GK-VDAC model based on our subtomogram 386  
331 average, we used rigid-body fitting to place two GK dimers 387  
332 end-to-end into a boat-shaped density (**Fig. S4b**, **Fig. 4b**). 388  
333 These fits defined a clear orientation for GK, with the N- 389  
334 termini pointing upwards and the C-terminal helices facing 390  
335 the OMM (**Fig. 4b**). To validate our fits, we mapped the 391  
336 cross-linked lysines onto the resulting model (**Fig. 4c**). All 392  
337 cross-links were between the cytosolic face of VDAC2 and 393  
338 the OMM-facing surface of GK, which is consistent with 394  
339 the orientation expected from our fits. Assigning GK-like 395  
340 proteins as constituents of the ordered OMM arrays at the 396

mitochondria-cytoskeleton interface is also supported by re-  
cent genetic studies. Sperm from mice lacking sperm-specific  
GK isoforms, which do not show glycerol kinase activity  
*in vitro* (Pan et al., 1999), have disorganized mitochondrial  
sheaths (Chen et al., 2017b; Shimada et al., 2019). In these  
mice, spherical mitochondria properly align along the flagel-  
lum but fail to properly elongate and coil around the ODFs  
(Shimada et al., 2019). This phenotype is consistent with our  
data showing direct links between GK protein arrays and the  
submitochondrial reticulum (**Fig. 2b-c**).

## Discussion

In this study, we used cryo-FIB milling-enabled cryo-  
ET to image the sperm mitochondrial sheath in three mam-  
malian species. Our data reveal that overall mitochondrial di-  
mensions are remarkably consistent in sperm from the same  
species (**Fig. 1, S1**). This contrasts with other mitochondria-  
rich tissues such as skeletal muscle, where there are massive  
variations in mitochondrial size and morphology within indi-  
vidual cells (Vincent et al., 2019). In addition, we did not ob-  
serve mitochondrial nanotunnels in any of the species we ex-  
amined, in contrast to their relative abundance in muscle tis-  
sue (Vincent et al., 2017, 2019). Our data also show that mi-  
tochondrial dimensions and cristae architecture vary across  
species (**Fig. 1**), providing possible structural bases for in-  
terspecific differences in mitochondrial energetics. Further  
comparative studies of how mitochondrial structure varies  
with sperm metabolism will undoubtedly contribute to our  
broader understanding of how mitochondrial form relates to  
function.

Our data show that, despite this diversity, the molecular  
underpinnings of mitochondrial sheath architecture are con-  
served, at least in mammals. Specifically, we identified novel  
inter-mitochondrial linkers that tether adjacent mitochondria  
(**Fig. 1, S2**) and arrays of boat-shaped particles that anchor  
mitochondria to the cytoskeleton (**Fig. 2, 3**). In-cell subtomog-  
ram averaging and in-cell XL-MS suggest that these arrays  
consist of GK-like proteins anchored on VDAC lattices in the  
OMM (**Fig. 4**). Given that VDACS are ubiquitous OMM pro-  
teins, our findings motivate further efforts to explore whether  
they also regulate mitochondria-cytoskeleton interactions in  
other cell types.

The OMM arrays may function to regulate the precise  
elongation and coiling of mitochondria, contributing to the  
striking consistency within the mitochondrial sheath. In ma-  
ture sperm, these arrays may help maintain the integrity of  
mitochondria-cytoskeleton contacts, stabilizing them against  
shear stresses during sperm motility and hyperactivation.  
However, it is unclear what determines the organization of  
these arrays in the first place. Our averages do not hint at di-  
rect interactions between boat-shaped particles. Instead, their  
spacing may be defined by the organization of the underlying  
VDAC lattice. Another intriguing possibility is that the ar-  
rays are organized by their cytoskeletal binding partners; the  
periodicity of relevant motifs on the submitochondrial retic-  
ulum could dictate the spacing of the OMM arrays.

To our knowledge, this is the first time such assemblies

397 have been visualized at any organelle-cytoskeleton interface 448  
398 in any cell type. Defining whether similar arrays are present 449  
399 in other differentiated cell types – and whether they use a sim- 450  
400 ilar pool of protein components – is an area ripe for study. In 451  
401 striated muscle, proper mitochondrial positioning is critical 452  
402 for muscle function and depends on direct associations be- 453  
403 tween mitochondria and intermediate filaments (Konieczny 454  
404 et al., 2008; Milner et al., 2000). Similarly, in skin cells, 455  
405 mitochondrial organization depends on keratin (Steen et al., 456  
406 2020). The structural bases for these associations are un- 457  
407 known, but cryo-ET and in-cell XL-MS may prove useful in 458  
408 these contexts as well.

## 409 Acknowledgements 461

410 The authors thank Dr. M Vanevic for excellent compu- 462  
411 tational support; Dr. D Vasishtan for providing scripts that 463  
412 greatly facilitated subtomogram averaging; Ingr. CTWM 464  
413 Schneijdenberg and JD Meeldijk for managing and maintain- 465  
414 ing the Utrecht University EM Square facility; Stal Schep 466  
415 (Tull en het Waal, The Netherlands) for providing horse semen; 467  
416 MW Haaker and M Houweling for providing mouse 468  
417 reproductive tracts; Prof. F Förster and Prof. A Akhmanova 469  
418 for critical reading of the manuscript; and Prof. EY Jones for 470  
419 insightful discussions. The authors also thank the Henriques 471  
420 Lab for the publicly-available L<sup>A</sup>T<sub>E</sub>X template. This work 472  
421 benefitted from access to the Netherlands Center for Electron 473  
422 Nanoscopy (NeCEN) with support from operators Dr. RS 474  
423 Dillard and Dr. CA Diebolder and IT support from B Alewi- 475  
424 jnse. RZC, JFH, and AJRH acknowledge support from NWO 476  
425 funding the Netherlands Proteomics Centre through the X- 477  
426 omics Road Map program (project 184.034.019). This work 478  
427 was funded by NWO Start-Up Grant 740.018.007 to TZ, and 479  
428 MRL is supported by a Clarendon Fund-Nuffield Department 480  
429 of Medicine Prize Studentship. 481

## 430 Author Contributions 483

431 PM, MZ, HH, EGB, and BMG provided sperm samples. 485  
432 MRL, MCR, and RTR prepared samples for cryo-ET. MRL 486  
433 performed cryo-FIB milling. MRL, MCR, RTR, SCH, and 487  
434 TZ collected cryo-ET data. MRL and MCR processed cryo- 488  
435 ET data. MRL, MCR, and TZ analyzed cryo-ET data. RZC 489  
436 and JFH performed all proteomics and cross-linking mass 490  
437 spectrometry experiments along with corresponding struc- 491  
438 tural modelling under the supervision of AJRH. MRL and 492  
439 TZ wrote the manuscript, and all authors contributed to revi- 493  
440 sions. 494

## 441 Declaration of Interests 495

442 The authors declare no competing interests. 496

## 443 Materials and Methods 497

444 **Sperm collection and preparation.** Pig sperm samples 499  
445 were purchased from an artificial insemination company 500  
446 (Varkens KI Nederland), stored at 18°C, and prepared for 501  
447 imaging within 1 day of delivery. Sperm were layered onto a 502

discontinuous gradient consisting of 4 mL of 35% Percoll® (GE Healthcare) underlaid with 2 mL of 70% Percoll®, both in HEPES-buffered saline (HBS: 20 mM HEPES, 137 mM NaCl, 10 mM glucose, 2.5 mM KCl, 0.1% kanamycin, pH 7.6) and centrifuged at 750g for 15 min at RT (Harrison et al., 1993). Pelleted cells were washed once in phosphate-buffered saline (PBS: 137 mM NaCl, 3 mM KCl, 8 mM Na<sub>2</sub>HPO<sub>4</sub>, 1.5 mM KH<sub>2</sub>PO<sub>4</sub>, pH 7.4), resuspended in PBS and counted with a hemocytometer.

Horse semen was collected from mature Warmblood stallions using a Hanover artificial vagina in the presence of a teaser mare. After collection, semen was filtered through gauze to remove gel fraction and large debris, then transported to the laboratory at 37°C and kept at room temperature until further processing. Semen was diluted in INRA96 (IMV Technologies) to obtain a sperm concentration of 30 x 10<sup>6</sup> cells/mL. After this, sperm were centrifuged through a discontinuous Percoll gradient as described above for pig sperm for 10 min at 300g followed by 10 min at 750g (Harrison et al., 1993). The remaining pellet was resuspended in 1 mL of PBS and centrifuged again for 5 min at 750g.

Mouse sperm were collected from the cauda epididymis of adult male C75BL/6 mice as described in (Hutcheon et al., 2017). Briefly, male mice were culled as described in (Mederacke et al., 2015) and the cauda epididymides were dissected with the vas deferens attached and placed in a 500 µL droplet of modified Biggers, Whitten, and Whittingham media (BWW: 20 mM HEPES, 91.5 mM NaCl, 4.6 mM KCl, 1.7 mM D-glucose, 0.27 mM sodium pyruvate, 44 mM sodium lactate, 5 U/mL penicillin, and 5 µg/mL streptomycin, adjusted to pH 7.4 and an osmolarity of 300 mOsm/kg). To retrieve the mature cauda spermatozoa from the epididymides, forceps were used to first gently push the stored sperm from the vas deferens, after which two incisions were made with a razor blade in the cauda. Spermatozoa were allowed to swim out of the cauda into the BWW over a period of 15 min at 37°C, after which the tissue was removed and sperm were loaded onto a 27% Percoll density gradient and washed by centrifugation at 400g for 15 min. The pellet consisting of an enriched sperm population was resuspended in BWW and again centrifuged at 400g for 2 min to remove excess Percoll.

**Cryo-EM grid preparation.** Typically, 3 µL of a suspension containing either 2-3 x 10<sup>6</sup> cells/mL (for whole cell tomography) or 20-30 x 10<sup>6</sup> cells/mL (for cryo-FIB milling) was pipetted onto a glow-discharged Quantifoil R 2/1 200-mesh holey carbon grid. One µL of a suspension of BSA-conjugated gold beads (Aurion) was added, and the grids then blotted manually from the back (opposite the side of cell deposition) for ~3 s (for whole cell tomography) or for ~5-6 s (for cryo-FIB milling) using a manual plunge-freezer (MPI Martinsreid). Grids were immediately plunged into a liquid ethane-propane mix (37% ethane) (Tivol et al., 2008) cooled to liquid nitrogen temperature. Grids were stored under liquid nitrogen until imaging.



**Cryo-focused ion beam milling.** Grids were mounted into modified Autogrids (ThermoFisher) for mechanical support. Clipped grids were loaded into an Aquilos (ThermoFisher) dual-beam cryo-focused ion beam/scanning electron microscope (cryo-FIB/SEM). All SEM imaging was performed at 2 kV and 13 pA, whereas FIB imaging for targeting was performed at 30 kV and 10 pA. Milling was typically performed with a stage tilt of 18°, so lamellae were inclined 11° relative to the grid. Each lamella was milled in four stages: an initial rough mill at 1 nA beam current, an intermediate mill at 300 pA, a fine mill at 100 pA, and a polishing step at 30 pA. Lamellae were milled with the wedge pre-milling technique described in (Schaffer et al., 2017) and with expansion segments as described in (Wolff et al., 2019).

**Tilt series acquisition.** Tilt series were acquired on either a Talos Arctica (ThermoFisher) operating at 200 kV or a Titan Krios (ThermoFisher) operating at 300 kV, both equipped with a post-column energy filter (Gatan) in zero-loss imaging mode with a 20-eV energy-selecting slit. All images were recorded on a K2 Summit direct electron detector (Gatan) in either counting or super-resolution mode with dose-fractionation. Tilt series were collected using SerialEM (Mastrorade, 2005) at a target defocus of between -4 and -6 µm (conventional defocus-contrast) or between -0.5 and -1.5 µm (for tilt series acquired with the Volta phase plate). Tilt series were typically recorded using either strict or grouped dose-symmetric schemes, either spanning ± 56° in 2° increments or ± 54° in 3° increments, with total dose limited to ~100 e<sup>-</sup>/Å<sup>2</sup>.

**Tomogram reconstruction.** Frames were aligned either post-acquisition using Motioncor2 1.2.1 (Zheng et al., 2017) or on-the-fly using Warp (Tegunov and Cramer, 2019). Frames were usually collected in counting mode; when super-resolution frames were used, they were binned 2X during motion correction. Tomograms were reconstructed in IMOD (Kremer et al., 1996) using weighted back-projection, with a SIRT-like filter (Zeng, 2012) applied for visualization and segmentation. Defocus-contrast tomograms were CTF-corrected in IMOD using *ctfphaseflip* while VPP tomograms were left uncorrected.

**Tomogram segmentation.** Segmentation was generally performed semi-automatically using the neural network-based workflow implemented in the TomoSeg package in EMAN 2.21 (Chen et al., 2017). Microtubules, however, were traced manually in IMOD. Segmentation was then manually refined in Chimera 1.12 (Pettersen et al., 2004) or in ChimeraX (Goddard et al., 2018). Visualization was performed in ChimeraX.

**Subtomogram averaging of ATP synthase and outer mitochondrial membrane arrays.** Subtomogram averaging with missing wedge compensation was performed using PEET 1.13.0 (Heumann et al., 2011; Nicastro et al., 2006). Resolution was estimated using the Fourier shell correlation (FSC) at a cut-off of 0.5 (Nicastro et al., 2006). Alignments

were generally performed first on binned data, after which aligned positions and orientations were transferred to less-binned data using scripts generously provided by Dr. Daven Vasishtan. Details of acquisition parameters and particle numbers are summarized in Table S1.

Alignment strategies for these complexes were designed to take advantage of their defined orientations relative to the membrane plane. Particles were picked manually and their initial orientations were defined using *stalkInit*. Initial references were either a randomly chosen particle (for ladder-like arrays) or an average of all particles after roughly aligning them based on their initial orientations (for ATP synthase). Independent alignments using independent initial references were performed for datasets from different species. Alignments allowed for large rotational search ranges around the particle long axis (defined as the y-axis, perpendicular to the membrane plane), with limited search ranges around the x- and z-axes (the membrane plane).

All initial alignments were performed without symmetry. After visual inspection of the maps, twofold symmetry was applied for ladder-like arrays. Symmetrization involved using the aligned positions from the unsymmetrized runs as seed points and rotating particles around the axis of symmetry to generate virtual particles. A symmetrized volume was generated by averaging all particles and virtual particles and used as a reference for a final, restricted alignment.

Plotbacks were generated in IMOD by first running *createAlignedModel* to generate model files reflecting updated particle positions and orientations after alignment. The relevant subtomogram average was then thresholded for visualization and saved as an isosurface model, which was then placed back into the tomograms using *clonemodel*.

**Measurements and quantification.** All measurements of mitochondrial width were performed in IMOD on Volta phase plate tomograms filtered with a SIRT-like filter. Mitochondrial width was measured in the non-missing wedge direction at five points along the length of each mitochondrion. Only mitochondria that were entirely in the field of view were included in the measurements. Tomograms and corresponding measurements were then grouped based on their locations relative to the connecting piece, which were determined based on low-magnification images used for targeting during data acquisition.

Internal mitochondrial ultrastructure was quantified from tomograms from cryo-FIB milled lamellae. The volume occupied by the matrix ( $V_{\text{matrix}}$ , the volume enclosed by the IMM) was measured relative to the volume occupied by the entire mitochondrion ( $V_{\text{mito}}$ , the volume enclosed by the OMM). Mesh volumes were extracted from segmentations using *imodinfo*. Because neural network-based segmentation often resulted in gaps, mitochondrial membranes were segmented manually in IMOD for quantification. Only slices in which both the IMM and OMM were clearly defined were used for segmentation.

**Cross-linking, lysis, digestion and peptide fractionation.** All proteomics and cross-linking mass spectrometry ex-

613 periments were performed on Percoll-washed pig sperm pre- 670  
614 pared as described above. For cross-linking, approximately 671  
615 300 x 106 cells were used from 3 different animals. Briefly, 672  
616 pelleted sperm cells were resuspended in 540  $\mu$ L of PBS 673  
617 supplemented with disuccinimidyl sulfoxide (DSSO, Thermo 674  
618 Fisher Scientific) to a final concentration of 1 mM. The reac- 675  
619 tion mix was incubated for 30 min at 25°C with 700 rpm 676  
620 shaking in a ThermoMixer C (Eppendorf) and subsequently 677  
621 quenched for 20 min by adding Tris-HCl (final concentra-  
622 tion 50 mM). Cross-linked cells were spun down at 13 800g 678  
623 for 10 min at 4°C, after which the supernatant was removed. 679  
624 Cells were then lysed according to a protocol modified from 680  
625 (Potel et al., 2018). Cells were resuspended in 1 mL of ly- 681  
626 sis buffer (100 mM Tris-HCl pH 8.5, 7 M Urea, 1% Triton 682  
627 X-100, 5 mM TCEP, 30 mM CAA, 10 U/ml DNase I, 1 mM 683  
628 MgCl<sub>2</sub>, 1% benzonase (Merck Millipore, Darmstadt, Ger- 684  
629 many), 1 mM sodium orthovanadate, phosphoSTOP phos- 685  
630 phatases inhibitors, and cOmplete™ Mini EDTA-free pro- 686  
631 tease inhibitors). Cells were sonicated on ice for 2 min us- 687  
632 ing an ultrasonic processor (UP100H, Hielscher) at 80% am- 688  
633 plitude. The proteins were then precipitated according to 689  
634 (Wessel and Flügge, 1984) and the dried protein pellet re- 690  
635 suspended in digestion buffer (100 mM Tris-HCl pH 8.5, 1% 691  
636 sodium deoxycholate (Sigma-Aldrich), 5 mM TCEP, and 30 692  
637 mM CAA). Trypsin and Lys-C proteases were added to a 1:25 693  
638 and 1:100 ratio (w/w) respectively and protein digestion per- 694  
639 formed overnight at 37°C. The final peptide mixtures were 695  
640 desalted with solid-phase extraction C18 columns (Sep-Pak, 696  
641 Waters) and fractionated with an Agilent 1200 HPLC pump 697  
642 system (Agilent) coupled to a strong cation exchange (SCX) 698  
643 separation column (Luna SCX 5  $\mu$ m – 100 Å particles, 50 x 699  
644 2mm, Phenomenex), resulting in 25 fractions. 700

645 **Liquid chromatography with mass spectrometry.** Ap- 701  
646 proximately 1000 ng of peptides from each biological repli- 702  
647 cate before SCX fractionation were first injected onto an Ag- 703  
648 ilent 1290 Infinity UHPLC system (Agilent) on a 50-cm an- 704  
649 alytical column packed with C18 beads (Dr Maisch Reprosil 705  
650 C18, 3  $\mu$ m) coupled online to an Orbitrap HF-X (Thermo 706  
651 Fisher Scientific). For this classical bottom-up analysis, we 707  
652 used the following LC-MS/MS parameters: after 5 min of 708  
653 loading with 100% buffer A (H<sub>2</sub>O with 0.1% formic acid), 709  
654 peptides were eluted at 300 nL/min with a 95-min gradient  
655 from 13% to 40% of buffer B (80% acetonitrile and 20% 710  
656 H<sub>2</sub>O with 0.1% formic acid). For MS acquisition we used an 711  
657 MS1 Orbitrap scan at 60,000 resolution, automatic gain con- 712  
658 trol (AGC) target of 3 x 106 ions and maximum inject time 713  
659 of 20 ms from 375 to 1600 m/z; the 15 most intense ions 714  
660 were submitted to MS2 Orbitrap scan at 30,000 resolution, 715  
661 AGC target of 1 x 105 ions and maximum inject time of 50 716  
662 ms (isolation window of 1.4 m/z, NCE at 27% and dynamic  
663 exclusion of 16 seconds). The SCX fractions were analyzed  
664 with same Agilent HPLC and the same nano-column cou-  
665 pled on-line to an Orbitrap Lumos mass spectrometer (Ther-  
666 moFisher Scientific). For these runs, we used a gradient from  
667 6% to 39% buffer B over 100 min with specific MS settings  
668 for DSSO cross-links: survey MS1 Orbitrap scan at 60,000  
669 resolution from 375 to 1500, AGC target of 4 x 105 ions and

maximum inject time of 50 ms; MS2 Orbitrap scan at 30,000  
resolution, AGC target of 5 x 104 ions, and maximum in-  
ject time of 100 ms for detection of DSSO signature peaks  
(difference in mass of 37.972 Da). The four ions with this  
specific difference were analyzed with a MS3 Ion Trap scans  
at AGC target of 2 x 104 ions, maximum inject time of 150  
ms for sequencing selected signature peaks (representing the  
individual peptides).

**Mass spectrometry data processing.** The 3 raw files ob-  
tained with classical bottom-up approach were analyzed with  
MaxQuant version 1.6.17 with all the automatic settings  
adding Deamidation (N) as dynamic modification against the  
Sus scrofa reference proteome (Uniprot version of 08/2020  
with 49,795 entries). With this search, we were able to  
calculate intensity-based absolute quantification (iBAQ) val-  
ues and created a smaller FASTA file to use for analysis of  
cross-linking experiments (table as Supplementary informa-  
tion). Raw files for cross-linked cells were analyzed with  
Proteome Discoverer software suite version 2.4.1.15 (Ther-  
moFisher Scientific) with the incorporated XlinkX node for  
analysis of cross-linked peptides as described in (Klykov et  
al., 2018). Data were searched against the smaller FASTA  
created in house with “MS2\_MS3 acquisition strategy”. For  
the XlinkX search, we selected full tryptic digestion with 3  
maximum missed cleavages, 10 ppm error for MS1, 20 ppm  
for MS2, and 0.5 Da for MS3 in Ion Trap. For modifications,  
we used static Carbamidomethyl (C) and dynamic Oxidation  
(M), Deamidation (N) and Met-loss (protein N-term). The  
crosslinked peptides were accepted with a minimum score of  
40, minimum score difference of 4 and maximum FDR rate  
set to 5%; further standard settings were used.

**Interactome analysis, homology modelling, and  
cross-link mapping.** The interaction map for VDAC pro-  
teins was generated in R (Grant et al., 2006) using the igrph  
package (v 1.2.4.2). Only cross-links with at least two cross-  
link spectral matches (CSMs) were used for network genera-  
tion. Homology models of GK and VDAC2 were generated  
in Robetta (Kim et al., 2004) and fitted into subtomogram  
average maps by rigid body fitting in Chimera X. Cross-links  
were mapped onto the resulting models using ChimeraX.

**Data availability.** Subtomogram average maps have been  
deposited to the Electron Microscopy Data Bank (EMDB)  
with the following accession numbers: EMD-12354,  
12355, 12356, and 12357. The model of putative glycerol  
kinase-like proteins anchored on a VDAC array has been de-  
posited to the Protein Data Bank (PDB) with the accession  
number PDB ID 7NIE.

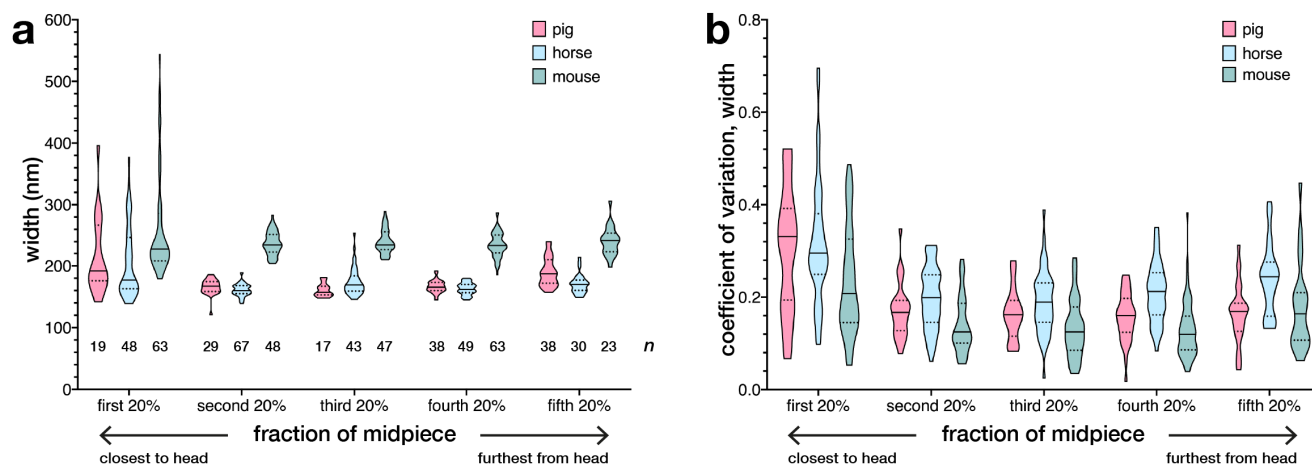

**Fig. S1. Mitochondrial dimensions are consistent within species but vary across species and spatially along the midpiece.** (a) Plotting the average width of mitochondria from different regions of the midpiece shows that mouse sperm mitochondria are larger than pig and horse sperm mitochondria. Note also that, in all three species, mitochondria at the proximal end of the midpiece are larger than those in more distal parts. (b) Mitochondrial width was measured at five points along the length of each mitochondrion. Plotting the coefficient of variation from different regions along the midpiece shows that mitochondria at the start of the midpiece have more variable widths along their lengths. In (a), n indicates the number of mitochondria analyzed. In both (a) and (b), solid lines represent the median and dotted lines represent the first and third quartiles.

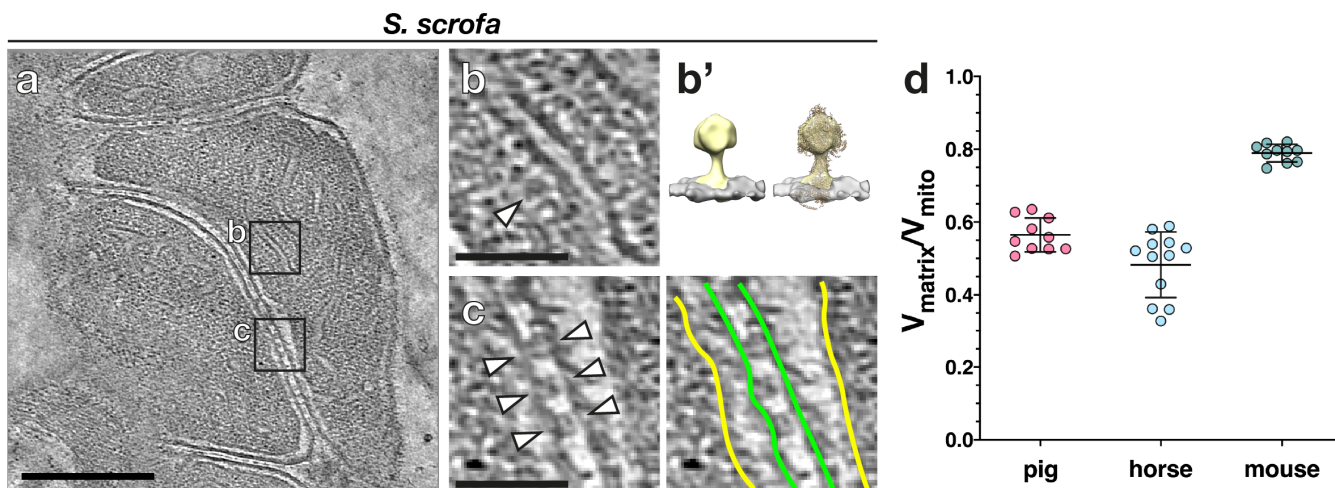

**Fig. S2. Cryo-focused ion beam (cryo-FIB) milling reveals the internal organization of sperm mitochondria.** (a) Slice through a cryo-tomogram of FIB-milled pig sperm mitochondria close to the connecting piece. (b) ATP synthase can be directly identified on cristae based on its characteristic shape, which is confirmed by subtomogram averaging (b'). (c) Novel inter-mitochondrial linkers tether neighboring mitochondria to each other (arrowheads in left panel). (d) Quantifying the volume enclosed by the mitochondrial matrix relative to the volume enclosed by the whole mitochondrion reveals that pig and horse sperm mitochondria have more expanded cristae and more condensed matrices than mouse sperm mitochondria. Lines represent mean  $\pm$  standard deviation. **Scale bars:** (a) 250 nm, (b-c) 100 nm.

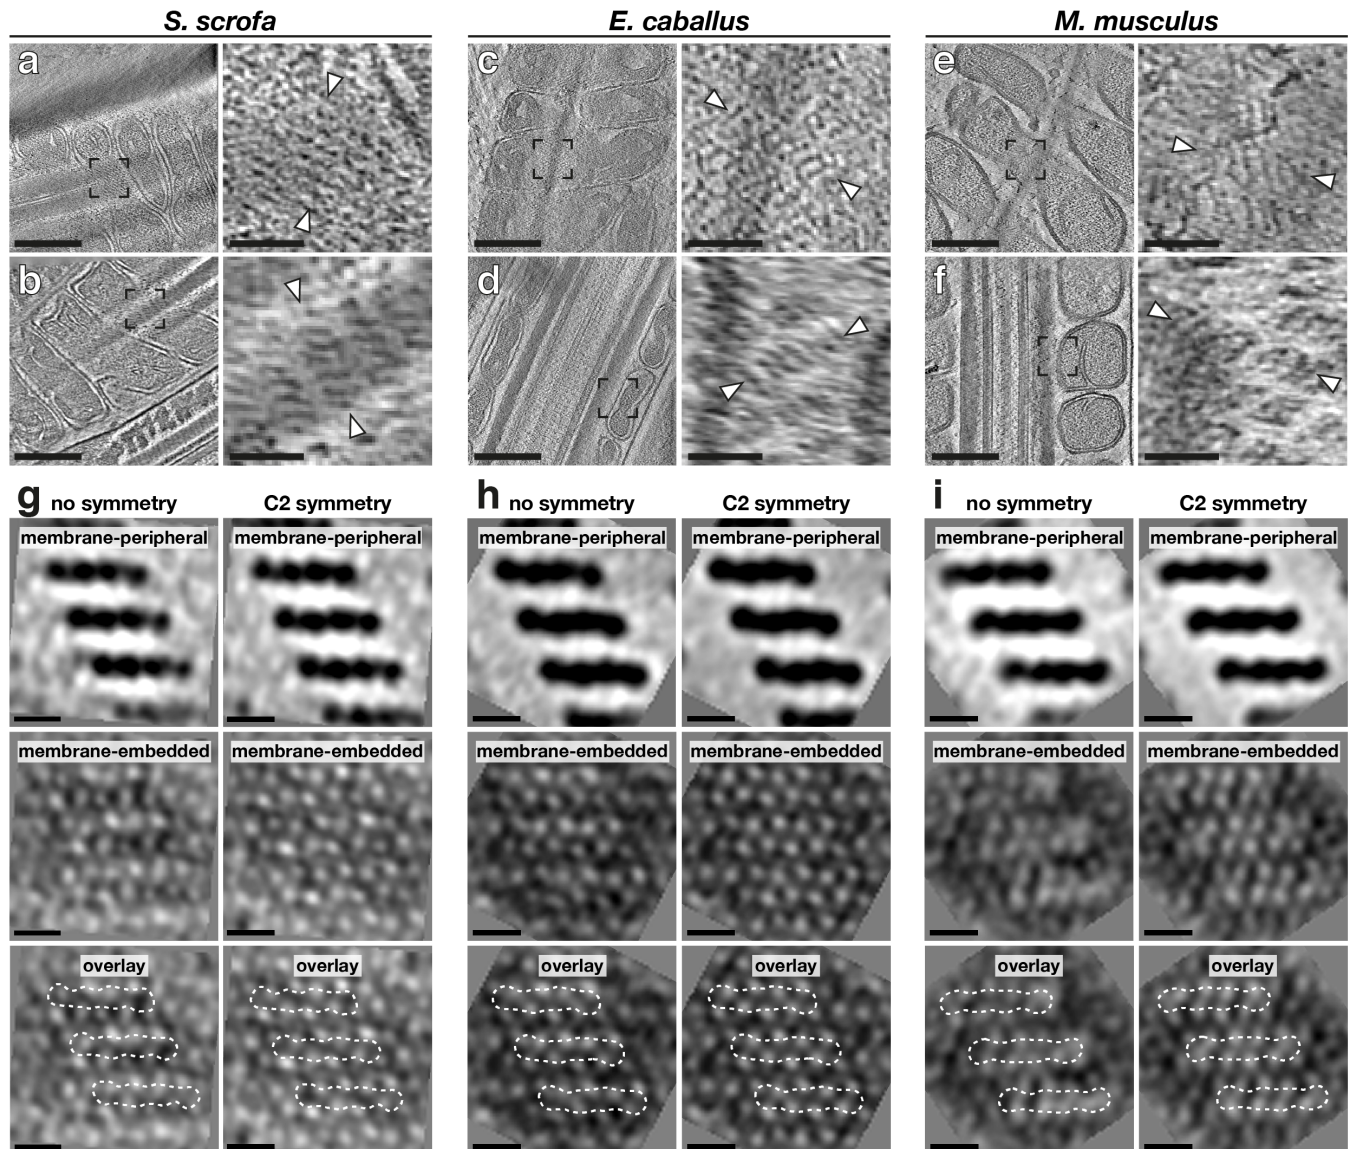

**Fig. S3. The particles forming the ordered arrays at the mitochondria-cytoskeleton interface are two-fold symmetric.** (a-f) Slices through cryo-tomograms of FIB-milled pig (a,b), horse (c,d), and mouse (e,f) mitochondria. Right panels show digital zooms of the regions boxed out in the left panels, with arrowheads indicating arrays. (g-i) Subtomogram averages of the arrays and the outer mitochondrial membrane (OMM) without (left) and with (right) twofold symmetry. **Scale bars:** (a-f) 250 nm, (g-i) 10 nm.

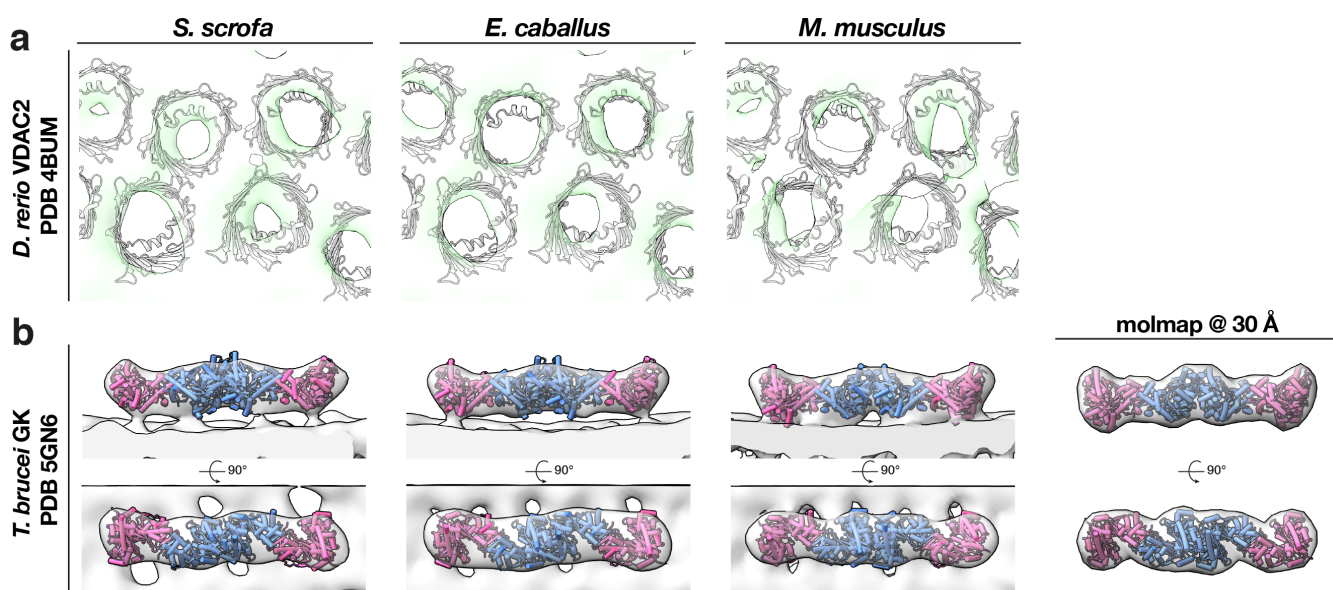

**Fig. S4. Fitting crystal structures of glycerol kinase (GK and voltage dependent anion channels (VDACs) into the pig subtomogram average map. (a)** The crystal structure of VDAC2 from zebrafish (PDB 4BUM) is shown in grey, fitted into the cryo-ET averaged map (green). **(b)** Two copies of a crystal structure of GK (pink and blue) from *Trypanosoma brucei* (PDB 5GN6) fitted into the cryo-ET averaged map (grey). On the right, the GK crystal structure is shown filtered to 30Å resolution.

**Table S1. Image acquisition and processing metrics for subtomogram averaging of mitochondrial protein complexes in mammalian sperm.**

| Parameter                                  | Species           |                       |                     |
|--------------------------------------------|-------------------|-----------------------|---------------------|
|                                            | <i>Sus scrofa</i> | <i>Equus caballus</i> | <i>Mus musculus</i> |
| <b>ATP synthase</b>                        |                   |                       |                     |
| sample type                                | lamellae          | -                     | -                   |
| number of cells used                       | 3                 | -                     | -                   |
| microscope (accelerating voltage)          | Arctica (200 kV)  | -                     | -                   |
| pixel size (Å)                             | 4.34              | -                     | -                   |
| symmetry                                   | C1                | -                     | -                   |
| number of particles                        | 209               | -                     | -                   |
| estimated resolution (Å)                   | 38                | -                     | -                   |
| <b>outer mitochondrial membrane arrays</b> |                   |                       |                     |
| sample type                                | lamellae          | lamellae              | lamellae            |
| number of cells used                       | 3                 | 3                     | 8                   |
| microscope (accelerating voltage)          | Arctica (200 kV)  | Arctica (200 kV)      | Arctica (200 kV)    |
| pixel size (Å)                             | 4.34              | 5.66                  | 5.66                |
| symmetry                                   | C1/C2             | C1/C2                 | C1/C2               |
| number of particles                        | 268/536           | 962/1924              | 972/1944            |
| estimated resolution (Å)                   | 39/35             | 38/33                 | 38/22               |

**Table S2. Top 35 most abundant outer mitochondrial membrane proteins identified in the pig sperm proteome.**

| Human homolog gene name* | Human homolog protein name*                               | iBAQ | unique peptides | sequence coverage (%) | MW (kDa) |
|--------------------------|-----------------------------------------------------------|------|-----------------|-----------------------|----------|
| VDAC2                    | Voltage-dependent anion-selective channel protein 2       | 9.42 | 17              | 70.4                  | 31.6     |
| VDAC3                    | Voltage-dependent anion-selective channel protein 3       | 9.19 | 13              | 62.2                  | 30.6     |
| SPATA18                  | Mitochondria-eating protein                               | 8.78 | 30              | 48                    | 63.3     |
| UBA52                    | Ubiquitin-60S ribosomal protein L40                       | 8.73 | 6               | 43                    | 14.7     |
| GK                       | Glycerol kinase                                           | 8.73 | 10              | 58.6                  | 57.7     |
| CYB5B                    | Cytochrome b5 type B                                      | 8.72 | 5               | 50.4                  | 13.9     |
| CISD1                    | CDGSH iron-sulfur domain-containing protein 1             | 8.72 | 5               | 50.5                  | 12.8     |
| SPATA19                  | Spermatogenesis-associated protein 19, mitochondrial      | 8.63 | 8               | 62.3                  | 18.0     |
| VDAC1                    | Voltage-dependent anion-selective channel protein 1       | 8.62 | 2               | 7.4                   | 30.7     |
| FUNDC2                   | FUN14 domain-containing protein 2                         | 8.58 | 10              | 58.2                  | 20.6     |
| HK1                      | Hexokinase-1                                              | 8.54 | 48              | 52.3                  | 102.6    |
| HADHB                    | Trifunctional enzyme subunit beta, mitochondrial          | 8.49 | 24              | 66.2                  | 49.4     |
| MAOA                     | Amine oxidase [flavin-containing] A                       | 8.4  | 32              | 38.9                  | 102.4    |
| ACSL6                    | Long-chain-fatty-acid-CoA ligase 6                        | 8.02 | 40              | 71.3                  | 77.8     |
| CYB5R3                   | NADH-cytochrome b5 reductase 3                            | 7.99 | 13              | 59.2                  | 30.8     |
| GK                       | Glycerol kinase                                           | 7.98 | 3               | 43.9                  | 57.6     |
| PHB2                     | Prohibitin-2                                              | 7.98 | 12              | 43.1                  | 33.4     |
| SEPTIN4                  | Septin-4                                                  | 7.83 | 18              | 50                    | 53.1     |
| SH3GLB1                  | Endophilin-B1                                             | 7.64 | 13              | 42.6                  | 44.1     |
| NME1                     | Nucleoside diphosphate kinase A                           | 7.55 | 5               | 60.5                  | 17.1     |
| TOMM34                   | Mitochondrial import receptor subunit TOM34               | 7.51 | 14              | 37.9                  | 34.6     |
| BR13BP                   | BR13-binding protein                                      | 7.5  | 4               | 16.1                  | 27.0     |
| SAMM50                   | Sorting and assembly machinery component 50 homolog       | 7.47 | 17              | 41.5                  | 51.5     |
| PGAM5                    | Serine/threonine-protein phosphatase PGAM5, mitochondrial | 7.46 | 12              | 40.3                  | 31.9     |
| MTX2                     | Metaxin-2                                                 | 7.45 | 5               | 27.1                  | 32.1     |
| LETMD1                   | LETM1 domain-containing protein 1                         | 7.35 | 10              | 37.8                  | 39.8     |
| VAT1                     | Synaptic vesicle membrane protein VAT-1 homolog           | 7.29 | 11              | 41                    | 42.7     |
| DNAJC11                  | DnaJ homolog subfamily C member 11                        | 7.22 | 15              | 33.9                  | 57.3     |
| COASY                    | Bifunctional coenzyme A synthase                          | 7.21 | 13              | 31                    | 61.7     |
| SYNJ2BP                  | Synaptojanin-2-binding protein                            | 7.17 | 4               | 28.3                  | 15.8     |
| TOMM40                   | Mitochondrial import receptor subunit TOM40 homolog       | 7.13 | 6               | 32.3                  | 34.7     |
| TOMM22                   | Mitochondrial import receptor subunit TOM22 homolog       | 7.1  | 2               | 22.7                  | 15.4     |
| CPT1B                    | Carnitine O-palmitoyltransferase 1, muscle isoform        | 7.05 | 13              | 21.4                  | 84.0     |
| VPS13A                   | Vacuolar protein sorting-associated protein 13A           | 6.87 | 50              | 21.8                  | 347.9    |
| MIF                      | Mitochondrial fission factor                              | 6.79 | 4               | 26.6                  | 27.0     |

- 717 **References** 800 Mol. Biol. 369, 413–418. 801
- 718 Al-Amoudi, A., Chang, J.-J., Lefrestier, A., McDowall, A., Salamin, L.M., Norlén, 802 Grant, B.J., Rodrigues, A.P.C., ElSawy, K.M., McCammon, J.A., and Caves, L.S.D. 803 (2006). Bio3d: an R package for the comparative analysis of protein structures. 804 Bioinformatics 22, 2695–2696. 805
- 719 L.P.O., Richter, K., Blanc, N.S., Studer, D., and Dubochet, J. (2004). Cryo-electron 806 Guo, X.W., and Mannella, C.A. (1993). Conformational change in the mitochondrial 807 microscopy of vitreous sections. EMBO J. 23, 3583–3588. 808 channel, VDAC, detected by electron cryo-microscopy. Biophys. J. 64, 545–549. 809
- 720 810 Gutnick, A., Banghart, M.R., West, E.R., and Schwarz, T.L. (2019). The 811 light-sensitive dimerizer zapalog reveals distinct modes of immobilization for axonal 812 mitochondria. Nat. Cell Biol. 21, 768–777. 813
- 721 814 Hackenbrock, C.R. (1968). Ultrastructural Bases for Metabolically Linked 815 Mechanical Activity in Mitochondria II. Electron Transport-Linked Ultrastructural 816 Transformations in Mitochondria. J. Cell Biol. 37, 345–369. 817
- 722 Balogun, E.O., Inaoka, D.K., Shiba, T., Tsuge, C., May, B., Sato, T., Kido, Y., Nara, 818 Heumann, J.M., Hoenger, A., and Mastronarde, D.N. (2011). Clustering and 819 variance maps for cryo-electron tomography using wedge-masked differences. J. 820 Struct. Biol. 175, 288–299. 821
- 723 T., Aoki, T., Honma, T., et al. (2019). Discovery of trypanocidal coumarins with 822 dual inhibition of both the glycerol kinase and alternative oxidase of *Trypanosoma* 823 *brucei*. FASEB J. 33, 13002–13013. 824
- 724 825 Bayrhuber, M., Meins, T., Habeck, M., Becker, S., Giller, K., Villinger, S., Vonrhein, 826 C., Griesinger, C., Zweckstetter, M., and Zeth, K. (2008). Structure of the 827 human voltage-dependent anion channel. Proc. Natl. Acad. Sci. U. S. A. 105, 828 15370–15375. 829
- 725 830 Bystrom, C.E., Pettigrew, D.W., Branchaud, B.P., O'Brien, P., and Remington, S.J. 831 (1999). Crystal structures of *Escherichia coli* glycerol kinase variant S58→W 832 in complex with nonhydrolyzable ATP analogues reveal a putative active con- 833 formation of the enzyme as a result of domain motion. Biochemistry 38, 3508–3518. 834
- 726 835 Chen, Y., and Sheng, Z.H. (2013). Kinesin-1-syntaphilin coupling mediates 836 activity-dependent regulation of axonal mitochondrial transport. J. Cell Biol. 202, 837 351–364. 838
- 727 839 Chen, M., Dai, W., Sun, S.Y., Jonasch, D., He, C.Y., Schmid, M.F., Chiu, W., and 840 Ludtke, S.J. (2017a). Convolutional neural networks for automated annotation of 841 cellular cryo-electron tomograms. Nat. Methods 14, 983–985. 842
- 728 843 Chen, Y., Liang, P., Huang, Y., Li, M., Zhang, X., Ding, C., Feng, J., Zhang, Z., 844 Zhang, X., Gao, Y., et al. (2017b). Glycerol kinase-like proteins cooperate with 845 Pld6 in regulating sperm mitochondrial sheath formation and male fertility. Cell 846 Discov. 3, 17030. 847
- 729 848 Colombini, M. (2012). VDAC structure, selectivity, and dynamics. Biochim. 849 Biophys. Acta - Biomembr. 1818, 1457–1465. 850
- 730 851 Danev, R., Buijsse, B., Khoshouei, M., Plitzko, J.M., and Baumeister, W. (2014). 852 Volta potential phase plate for in-focus phase contrast transmission electron 853 microscopy. Proc. Natl. Acad. Sci. U. S. A. 111, 15635–15640. 854
- 731 855 Davila, M.P., Muñoz, P.M., Bolaños, J.M.G., Stout, T.A.E., Gadella, B.M., Tapia, 856 J.A., Balao Da Silva, C., Ortega Ferrusola, C., and Peña, F.J. (2016). Mitochondrial 857 ATP is required for the maintenance of membrane integrity in stallion spermatozoa, 858 whereas motility requires both glycolysis and oxidative phosphorylation. Reproduction 152, 683–694. 859
- 732 860 Duvert, M., Mazat, J.-P., and Baretts, A.-L. (1985). Intermitochondrial junctions in 861 the heart of the frog, *Rana esculenta*. Cell Tissue Res. 241, 129–137. 862
- 733 863 Fasci, D., van Ingen, H., Scheltema, R.A., and Heck, A.J.R. (2018). Histone 864 Interaction Landscapes Visualized by Crosslinking Mass Spectrometry in Intact 865 Cell Nuclei. Mol. Cell. Proteomics 17, 2018–2033. 866
- 734 867 Fawcett, D.W. (1970). A comparative view of sperm ultrastructure. Biol. Reprod. 868 Suppl. 2, 90–127. 869
- 735 870 Fawcett, D.W. (1975). The mammalian spermatozoon. Dev. Biol. 44, 394–436. 871
- 736 872 Fenton, A.R., Jongens, T.A., and Holzbaur, E.L.F. (2021). Mitochondrial dynamics: 873 Shaping and remodeling an organelle network. Curr. Opin. Cell Biol. 68, 28–36. 874
- 737 875 Friend, D.S., and Heuser, J.E. (1981). Orderly particle arrays on the mitochondrial 876 outer membrane in rapidly-frozen sperm. Anat. Rec. 199, 159–175. 877
- 738 878 Fukuda, Y., Laugks, U., Lučić, V., Baumeister, W., and Danev, R. (2015). Electron 879 cryotomography of vitrified cells with a Volta phase plate. J. Struct. Biol. 190, 880 143–154. 881
- 739 882 Fukuda, Y., Abe, A., Tamura, T., Kishimoto, T., Sogabe, A., Akanuma, S., Yokobori, 883 S.I., Yamagishi, A., Imada, K., and Inagaki, K. (2016). Epistasis effects of 884 multiple ancestral-consensus amino acid substitutions on the thermal stability 885 of glycerol kinase from *Cellulomonas* sp. NT3060. J. Biosci. Bioeng. 121, 497–502. 886
- 740 887 Glancy, B., Hartnell, L.M., Malide, D., Yu, Z.X., Combs, C.A., Connelly, P.S., 888 Subramaniam, S., and Balaban, R.S. (2015). Mitochondrial reticulum for cellular 889 energy distribution in muscle. Nature 523, 617–620. 890
- 741 891 Goddard, T.D., Huang, C.C., Meng, E.C., Pettersen, E.F., Couch, G.S., Morris, 892 J.H., and Ferrin, T.E. (2018). UCSF ChimeraX: Meeting modern challenges in 893 visualization and analysis. Protein Sci. 27, 14–25. 894
- 742 895 Gonçalves, R.P., Buzhynskyy, N., Prima, V., Sturgis, J.N., and Scheuring, S. (2007). 896 Supramolecular Assembly of VDAC in Native Mitochondrial Outer Membranes. J. 897 898 899



- 886 Metabolic strategy of boar spermatozoa revealed by a metabolomic characteriza- 971  
887 tion. *FEBS Lett.* 554, 342–346. 972  
888 973  
889 De Martino, C., Floridi, A., Marcante, M.L., Malorni, W., Barcellona, P.S., Bellocchi, 974  
890 M., and Silvestrini, B. (1979). Morphological, histochemical and biochemical 975  
891 studies on germ cell mitochondria of normal rats. *Cell Tissue Res.* 196, 1–22. 976  
892 977  
893 Mastronarde, D.N. (2005). Automated electron microscope tomography using 978  
894 robust prediction of specimen movements. *J. Struct. Biol.* 152, 36–51. 979  
895 980  
896 Mederacke, I., Dapito, D.H., Affò, S., Uchinami, H., and Schwabe, R.F. (2015). 981  
897 High-yield and high-purity isolation of hepatic stellate cells from normal and fibrotic 982  
898 mouse livers. *Nat. Protoc.* 10, 305–315. 983  
899 984  
900 Mi, Y., Shi, Z., and Li, J. (2015). Spata19 is critical for sperm mitochondrial function 985  
901 and male fertility. *Mol. Reprod. Dev.* 82, 907–913. 986  
902 987  
903 Milner, D.J., Mavroidis, M., Weisleder, N., and Capetanaki, Y. (2000). Desmin 988  
904 cytoskeleton linked to muscle mitochondrial distribution and respiratory function. *J.* 989  
905 *Cell Biol.* 150, 1283–1297. 990  
906 991  
907 Moore, A.S., and Holzbaur, E.L. (2018). Mitochondrial-cytoskeletal interactions: 992  
908 dynamic associations that facilitate network function and remodeling. *Curr. Opin.* 993  
909 *Physiol.* 3, 94–100. 994  
910 995  
911 Mukai, C., and Okuno, M. (2004). Glycolysis Plays a Major Role for Adenosine 996  
912 Triphosphate Supplementation in Mouse Sperm Flagellar Movement. *Biol. Reprod.* 997  
913 71, 540–547. 998  
914 999  
915 Newport, T.D., Sansom, M.S.P., and Stansfeld, P.J. (2019). The MemProtMD 1000  
916 database: a resource for membrane-embedded protein structures and their lipid 1001  
917 interactions. *Nucleic Acids Res.* 47, D390–D397. 1002  
918 1003  
919 Nicastro, D., Schwartz, C., Pierson, J., Gaudette, R., Porter, M.E., and McIntosh, 1004  
920 J.R. (2006). The molecular architecture of axonemes revealed by cryoelectron 1005  
921 tomography. *Science.* 313, 944–948. 1006  
922 1007  
923 Odet, F., Gabel, S., London, R.E., Goldberg, E., and Eddy, E.M. (2013). Glycolysis 1008  
924 and Mitochondrial Respiration in Mouse LDHC-Null Sperm. *Biol. Reprod.* 88, 1–7. 1009  
925 1010  
926 Olson, G.E., and Winfrey, V.P. (1986). Identification of a cytoskeletal network 1011  
927 adherent to the mitochondria of mammalian spermatozoa. *J. Ultrastruct. Res. Mol.* 1012  
928 *Struct. Res.* 94, 131–139. 1013  
929 1014  
930 Olson, G.E., and Winfrey, V.P. (1990). Mitochondria-cytoskeleton interactions in the 1015  
931 sperm midpiece. *J. Struct. Biol.* 103, 13–22. 1016  
932 1017  
933 Olson, G.E., and Winfrey, V.P. (1992). Structural organization of surface domains 1018  
934 of sperm mitochondria. *Mol. Reprod. Dev.* 33, 89–98. 1019  
935 1020  
936 Otani, H., Tanaka, O., Kasai, K. -I, and Yoshioka, T. (1988). Development of 1021  
937 mitochondrial helical sheath in the middle piece of the mouse spermatid tail. 1022  
938 Regular dispositions and synchronized changes. *Anat. Rec.* 222, 26–33. 1023  
939 1024  
940 Pan, Y., Decker, W.K., Huq, A.H.H.M., and Craigen, W.J. (1999). Retrotransposition 1025  
941 of Glycerol Kinase-Related Genes from the X Chromosome to Autosomes: 1026  
942 Functional and Evolutionary Aspects. *Genomics* 59, 282–290. 1027  
943 1028  
944 Perkins, G.A., and Ellisman, M.H. (2011). Mitochondrial configurations in peripheral 1029  
945 nerve suggest differential ATP production. *J. Struct. Biol.* 173, 117–127. 1030  
946 1031  
947 Pettersen, E.F., Goddard, T.D., Huang, C.C., Couch, G.S., Greenblatt, D.M., 1032  
948 Meng, E.C., and Ferrin, T.E. (2004). UCSF Chimera - A visualization system for 1033  
949 exploratory research and analysis. *J. Comput. Chem.* 25, 1605–1612. 1034  
950 1035  
951 Picard, M., McManus, M.J., Csordás, G., Várnai, P., Dorn, G.W., Williams, D., 1036  
952 Hajnóczky, G., and Wallace, D.C. (2015). Trans-mitochondrial coordination of 1037  
953 cristae at regulated membrane junctions. *Nat. Commun.* 6, 6259. 1038  
954 1039  
955 Potel, C.M., Lin, M.-H., Heck, A.J.R., and Lemeer, S. (2018). Defeating Major 1040  
956 Contaminants in Fe<sup>3+</sup> - Immobilized Metal Ion Affinity Chromatography (IMAC) 1041  
957 Phosphopeptide Enrichment. *Mol. Cell. Proteomics* 17, 1028–1034. 1042  
958 1043  
959 Quillin, M.L., and Matthews, B.W. (2000). Accurate calculation of the density of 1044  
960 proteins. *Acta Crystallogr. Sect. D Biol. Crystallogr.* 56, 791–794. 1045  
961 1046  
962 Sampson, M.J., Decker, W.K., Beaudet, A.L., Ruitenbeek, W., Armstrong, D., 1047  
963 Hicks, M.J., and Craigen, W.J. (2001). Immotile Sperm and Infertility in Mice 1048  
964 Lacking Mitochondrial Voltage-dependent Anion Channel Type 3. *J. Biol. Chem.* 1049  
965 276, 39206–39212. 1050  
966 1051  
967 Schaffer, M., Mahamid, J., Engel, B.D., Laugks, T., Baumeister, W., and Plitzko, 1052  
968 J.M. (2017). Optimized cryo-focused ion beam sample preparation aimed at in situ 1053  
969 structural studies of membrane proteins. *J. Struct. Biol.* 197, 73–82. 1054  
970 1055
- Schneider, M., Forster, H., Boersma, A., Seiler, A., Wehnes, H., Sinowatz, F.,  
Neumüller, C., Deutsch, M.J., Walch, A., Angelis, M.H., et al. (2009). Mitochondrial  
glutathione peroxidase 4 disruption causes male infertility. *FASEB J.* 23,  
3233–3242.
- Schnick, C., Polley, S.D., Fivelman, Q.L., Ranford-Cartwright, L.C., Wilkinson,  
S.R., Brannigan, J.A., Wilkinson, A.J., and Baker, D.A. (2009). Structure and  
non-essential function of glycerol kinase in *Plasmodium falciparum* blood stages.  
*Mol. Microbiol.* 71, 533–545.
- Schredelseker, J., Paz, A., López, C.J., Altenbach, C., Leung, C.S., Drexler, M.K.,  
Chen, J.-N., Hubbell, W.L., and Abramson, J. (2014). High Resolution Structure  
and Double Electron-Electron Resonance of the Zebrafish Voltage-dependent  
Anion Channel 2 Reveal an Oligomeric Population. *J. Biol. Chem.* 289,  
12566–12577.
- Shimada, K., Kato, H., Miyata, H., and Ikawa, M. (2019). Glycerol kinase 2  
is essential for proper arrangement of crescent-like mitochondria to form the  
mitochondrial sheath during mouse spermatogenesis. *J. Reprod. Dev.* 65,  
155–162.
- Steen, K., Chen, D., Wang, F., Majumdar, R., Chen, S., Kumar, S., Lombard,  
D.B., Weigert, R., Ziemann, A.G., Parent, C.A., et al. (2020). A role for keratins in  
supporting mitochondrial organization and function in skin keratinocytes. *Mol. Biol.*  
*Cell* 31, 1103–1111.
- Stone, M.R., O'Neill, A., Lovering, R.M., Strong, J., Resneck, W.G., Reed, P.W.,  
Toivola, D.M., Ursitti, J.A., Omary, M.B., and Bloch, R.J. (2007). Absence of  
keratin 19 in mice causes skeletal myopathy with mitochondrial and sarcolemmal  
reorganization. *J. Cell Sci.* 120, 3999–4008.
- Tegunov, D., and Cramer, P. (2019). Real-time cryo-electron microscopy data  
preprocessing with Warp. *Nat. Methods* 16, 1146–1152.
- Tivol, W.F., Briegel, A., and Jensen, G.J. (2008). An Improved Cryogen for Plunge  
Freezing. *Microsc. Microanal.* 14, 375–379.
- Tomasello, M.F., Guarino, F., Reina, S., Messina, A., and De Pinto, V. (2013).  
The Voltage-Dependent Anion Selective Channel 1 (VDAC1) Topography in the  
Mitochondrial Outer Membrane as Detected in Intact Cell. *PLoS One* 8, e81522.
- Tourmente, M., Villar-Moya, P., Rial, E., and Roldan, E.R.S. (2015). Differences in  
ATP generation via glycolysis and oxidative phosphorylation and relationships with  
sperm motility in mouse species. *J. Biol. Chem.* 290, 20613–20626.
- Viana, M.P., Brown, A.I., Mueller, I.A., Goul, C., Koslover, E.F., and Rafelski, S.M.  
(2020). Mitochondrial Fission and Fusion Dynamics Generate Efficient, Robust,  
and Evenly Distributed Network Topologies in Budding Yeast Cells. *Cell Syst.* 10,  
287–297.e5.
- Vincent, A.E., Turnbull, D.M., Eisner, V., Hajnóczky, G., and Picard, M. (2017).  
Mitochondrial Nanotunnels. *Trends Cell Biol.* 27, 787–799.
- Vincent, A.E., White, K., Davey, T., Phillips, J., Ogden, R.T., Lawess, C., Warren,  
C., Hall, M.G., Ng, Y.S., Falkous, G., et al. (2019). Quantitative 3D Mapping of the  
Human Skeletal Muscle Mitochondrial Network. *Cell Rep.* 26, 996–1009.e4.
- Wessel, D., and Flügge, U.I. (1984). A method for the quantitative recovery of  
protein in dilute solution in the presence of detergents and lipids. *Anal. Biochem.*  
138, 141–143.
- Wolff, G., Limpens, R.W.A.L., Zheng, S., Snijder, E.J., Agard, D.A., Koster, A.J.,  
and Bárcena, M. (2019). Mind the gap: Micro-expansion joints drastically decrease  
the bending of FIB-milled cryo-lamellae. *J. Struct. Biol.* 208, 107389.
- Woolley, D.M., Neesen, J., and Vernon, G.G. (2005). Further studies on knockout  
mice lacking a functional dynein heavy chain (MDHC7). 2. A developmental  
explanation for the asthenozoospermia. *Cell Motil. Cytoskeleton* 61, 74–82.
- Zeng, G.L. (2012). A filtered backprojection algorithm with characteristics of the  
iterative Landweber algorithm. *Med. Phys.* 39, 603–607.
- Zhang, Y., Ou, Y., Cheng, M., Shojaei Saadi, H., Thundathil, J.C., and van der  
Hoorn, F.A. (2012). KLC3 is involved in sperm tail midpiece formation and sperm  
function. *Dev. Biol.* 366, 101–110.
- Zheng, S.Q., Palovcak, E., Armache, J.P., Verba, K.A., Cheng, Y., and Agard, D.A.  
(2017). MotionCor2: Anisotropic correction of beam-induced motion for improved  
cryo-electron microscopy. *Nat. Methods* 14, 331–332.
